# Supplementary material for: New Material of Beelzebufo, a Hyperossified Frog (Amphibia: Anura) from the Late Cretaceous of Madagascar
Source: PubMed Central journal article supplement (PMC3905036; doi:10.1371/journal.pone.0087236), 2014-01-28
Supplement: pone.0087236.s001.pdf [file pone.0087236.s001.pdf]

# File S1. Documentation, sensitivity analyses, supplementary trees and tables.

## Section A. Three-dimensional digital skeletal model of *Beelzebufo ampinga*.

### Description and Rationale

The three-dimensional digital skeletal model of *Beelzebufo ampinga* uses only elements from *Beelzebufo* and from the postcranial skeleton of a single individual of *Ceratophrys aurita* (LACM 163430). The goal of the reconstruction was to create a conservative, repeatable, and defensible model that relied on a minimum of assumptions for and alterations to the model animal skeleton LACM 163430 beyond an initial calibration and, aside from mirroring and filling in missing spaces in the tooth row, a minimum of alteration to specimens of *Beelzebufo*. No non-*Beelzebufo* material was used in the cranial model as it was originally constructed, but for aesthetic reasons a re-scaled and re-proportioned surface of the jaws of *Ceratophrys aurita* (LACM 163430) was added prior to imaging for the manuscript for Figures 1, 2, and 5 (see below). For alterations that were necessary, we adhered whenever possible to an assumption of isometric shape change, not for biological reasons but rather to keep any shape change as conservative and non-arbitrary as possible. All size and shape changes were documented and comparisons with original, non-altered materials as simple as a side-by-side file comparison. All shape positions exist in a single coordinate space and can be easily recorded, and differences in hypothetical positions tracked exactly.

The relative completeness of FMNH PR 2512, as well as it being the only recovered specimen with both crania and postcrania, made it the best candidate for an accurate composite skeletal reconstruction. Because of a lack of knowledge of relative proportions amongst those specimens in the cranial and postcranial skeleton of *Beelzebufo* not from FMNH PR 2512, we sought to minimize arbitrary, non-mirroring alterations (isometrically or allometrically) of digital surfaces of elements, and allowed it in only one case for *Beelzebufo* (we increased the size of UA 9947 isometrically by a factor of 1.06305). This resulted in the exclusion of some specimens, notably vertebrae from the posterior portion of the column, from the reconstruction; this exclusion implies only that, within our scaling of LACM 163430 as calibrated to FMNH PR 2512 (see below), these vertebrae are outside the size range of a hypothetical individual of *Beelzebufo* having the size of FMNH PR 2512.

### Cranial Model (Figs 1–5)

Work on the digital cranial model of *Beelzebufo* began early in 2010 but was catalyzed by discoveries of additional material of FMNH PR 2512 in the austral winters of 2010 and 2011. Because FMNH PR 2512 is preserved from its cranial posterolateral margin to its midline, it allowed for a clear and well-defined posterior skull width and height, within the context of which it became possible to place additional specimens with a high degree of confidence, although the precise relationship of the anterior and posterior portions of the skull is not yet known because of a lack of overlap in morphology. Final placement of cranial fragments was ultimately based on assumptions of the extent and form of missing material, largely through extrapolation of sutural surfaces, and largely on the anterior portions of the skull.

The scale or proportion of no specimen used in the cranial reconstruction was altered. Although it is not the case that all specimens are from individuals of a single size, there is no direct evidence available to define or restrict relative changes in a way not considered arbitrary. No non-*Beelzebufo* material was used in the cranial model as it was originally constructed, but a re-scaled and re-proportioned surface of the jaws of LACM 163430 (mediolateral and dorsoventral dimensions increased by a factor of 1.16545; anteroposterior dimension increased by a factor of 1.38148) was added prior to imaging for the manuscript (Figs 1–2). Most missing but reconstructed morphology was inferred through the assumption of bilateral symmetry;

mirror-imaging of relevant specimen surfaces were used to accomplish this. Homologous portions of overlapping morphology, particularly in the maxilla and quadratojugal, allowed for reasonable composite modelling from multiple specimens although, in the facial process of the maxilla in particular, slight differences in size between FMNH PR 2510 and FMNH PR 2507 resulted in a small portion (~2 mm) of doubled morphology in the anteromedial portion of the process.

Gaps in the tooth row in the premaxilla, at the premaxilla/maxilla boundary, and within the maxilla were reconstructed not by mirroring, but by cloning portions of the tooth row of FMNH PR 2510. This was the only instance of deliberately introducing incorrectly-positioned morphology to the model, but is justifiable given the relative invariance of tooth row morphology in anurans.

### **Postcranial model (Figs 1, 2, 5, and 32)**

Unlike the skull, the paucity of preserved postcranial remains of *Beelzebufo* necessitated the introduction of a model framework of a known skeleton. This missing material was modelled using a large female skeleton of *Ceratophrys aurita* (LACM 163430). *Ceratophrys* was selected as a model animal due to the consistent placement of *Beelzebufo* within the Ceratophryidae in phylogenetic analyses, as well as its similarly large size and inferred similar ecological habit.

Because the atlas/occipital articulation from FMNH PR 2512 is preserved, we use this relationship to calibrate the entire postcranium of LACM 163430 to the atlas and second presacral (PS) vertebra, and thus to the skull of FMNH PR 2512. As a first step, however, both the atlas + PS 2 of LACM 163430 and the atlas of FMNH PR 2512 were compared to the holotype (UA 9600) cervical + PS 2 as a keystone surface, because of the relative completeness of the holotype and our desire to use the holotype as part of the reconstruction.

The atlas + PS 2 of LACM 163430 was largely size and shape consistent with UA 9600 in the anteroposterior and mediolateral dimensions when increased by a factor of 1.10124. The dorsoventral dimension, however, was still relatively low when compared to UA 9600, and so the effective dorsoventral dimension was increased by a factor of 1.23773. These numbers were used to create a transformed axial column polygon mesh of LACM 163430, resulting in a surface representing the model size of the axial column (and by assumption, appendicular skeleton) of the holotype of *Beelzebufo*.

In scaling the holotype to FMNH PR 2512, an isometrically applied factor of 0.955296 was required to create an atlas + PS 2 the size of that of FMNH PR 2512. This effectively smaller holotype surface is what was incorporated into the model.

Finally, to scale the holotype-calibrated axial column (and by assumption appendicular material) of LACM 163430 to the skull of FMNH PR 2512, we used the factors of 1.10124 and 0.955296 to arrive at a model factor for LACM 163430 of 1.05201. This factor was applied uniformly to the remaining postcranial surfaces of LACM 163430, and this served as the framework into which elements of *Beelzebufo* were placed. With the exception of presacral vertebra UA 9947, which was expanded isometrically by a factor of 1.06305, no further alterations to the size of any element in the model was altered after this point.

Likely owing to a number of factors including phylogenetic position, size, convergence, and the conservative nature of the anuran skeleton, the model skeleton provided a surprisingly good fit for most (though not all) postcranial materials of *Beelzebufo*. In instances where combining homologous portions of the skeleton yielded obvious discontinuities (such as the relatively posteriorly projecting transverse processes of FMNH PR 2512 Vertebra B versus the *Ceratophrys*-based PS5, and the much more dorsally accentuated dorsal ridge on the urostyle of *Ceratophrys*), triangles in the *Ceratophrys* model were always blended to accommodate those of *Beelzebufo*.

Unlike the cranial model, use of mirroring was restricted because the model skeleton provides a complete view of the reconstructed size and elements of the animal. Mirroring was used in FMNH PR 2512 Vertebra B and sacral vertebra FMNH PR 2003 to provide midline symmetry to the axial column.

## Videos

Supplemental mpeg videos for Figs 1, 4a, and 5 were created using the Avizo 7.1 Movie Maker module. Six hundred frames were captured at a frame rate of 50/second and a quality metric of 0.4. The videos associated with Figs 1 and 5 were captured with a screen resolution of 528 x 1008, and the surface models of the forelimbs, pectoral girdle, and jaws were rendered transparent (0.8) to improve visibility of highlighted specimens on the ventral aspect of the skull and axial column. The video for Fig. 4 was captured at a screen resolution of 992 x 1008.

### Associated videos

**Video S1 Supplemental video to Fig. 1.** Three-dimensional model of *Beelzebufo ampinga* skeleton through a full rotation around the midline axis, highlighting sources of model materials. Model as imaged and described in Fig. 1, except with left forelimb visible and reconstructed jaws and forelimbs rendered transparent to display ventral cranium clearly.

**Video S2 Supplemental video to Fig. 4a.** Skull reconstruction of *Beelzebufo ampinga*. Model as imaged and described in Fig. 4a, but through a full rotation around the midline axis.

**Video S3 Supplemental video to Fig. 5.** Three-dimensional model of skeleton of *Beelzebufo ampinga* through a full rotation around the midline axis, highlighting specimen FMNH PR 2512 (dark blue) from other specimens of *Beelzebufo* (light blue), and showing sources of reconstructed materials. Model as imaged and described in Fig. 5, except with left forelimb visible and reconstructed jaws and forelimbs rendered transparent to display ventral cranium clearly.

## Section B. Reference taxon list for species used in the combined phylogenetic analysis.

The revised nomenclatural revisions (in bold) are based on Amphibian Species of the World 5.6, an Online reference [Section F, Reference 1]

*Afrana angolensis* = *Amieta angoliensis*

*Afrivalus*

MORPH: fulvovittatus

DNA: knysnae

*Allophryne ruthveni*

*Alytes obstetricans*

*Amnirana albolabris* = ***Hylarana albolabris***

†*Arariphrynus placidoi*

*Arthroleptis*

MORPH: *adolphifriederici*

DNA: *xenodactyloides*

*Ascaphus montanus*

*Ascaphus truei*

*Astylosternus diadematus*

*Aubria subsigillata*

*Batrachophrynus* sp.

†*Baurubatrachus pricei*

†*Beelzebufo ampinga*

*Bombina variegata*

*Bufo granulosis* = ***Incilius nebulifer***

*Bufo viridis*  
*Callulops*  
     MORPH: *kopsteini*  
     DNA: *robustus*  
*Calyptocephallela gayi*  
*Cardioglossa*  
     MORPH: *cyaneospila*  
     DNA: *elegans*  
*Ceratobatrachus guentheri*  
*Ceratophrys ornata*  
*Chacophrys pierottii*  
*Chiromantis rufescens*  
*Conraua*  
     MORPH: *crassipes*  
     DNA: *robusta*  
 †*Cratia gracilis*  
*Cyclorana australis* = ***Litoria australis***  
*Dendropsophus nanus*  
*Dermatonotus muelleri*  
*Discoglossus pictus*  
*Dyscophus*  
     MORPH: sp.  
     DNA: *insularis*  
 †*Eurycephalella alcinae*  
*Flectonotus fitzgeraldi*  
*Gastrotheca gracilis*  
*Guibemantis liber*  
*Heleioporus*  
     MORPH: *eyeri*  
     DNA: *australiacus*  
*Heleophryne*  
     MORPH: *natalensis* = ***Hadromophryne natalensis***  
     DNA: *purcelli*  
*Hemiphractus*  
     MORPH: sp  
     DNA: *scutatus*  
*Hoplobatrachus occipitalis*  
*Hylarana*  
     MORPH: *albolabris*  
     DNA: *nicobariensis*  
*Hymenochirus boettgeri*  
*Hyperolius kivuensis*  
*Hypsiboas andinus* = ***Hypsiboas riojanus***  
*Isthmohyla rivularis*  
*Kassina senegalensis*  
*Leiopelma archeyi*  
*Leiopelma hamiltoni*  
*Leiopelma hochstetteri*  
*Leiopelma pakeka*  
*Lepidobatrachus laevis*  
*Leptodactylus ocellatus* = ***Leptodactylus bolivianus***  
*Leptopelis*  
     MORPH: *christyi*

DNA: *argenteus*  
*Limnodynastes dorsalis*  
*Litoria lesueurii*  
*Megophrys nasuta*  
*Melanophryniscus stelzneri*  
*Mixophyes schevilli*  
*Nannophryne variegatus* = ***Bufo variegatus***  
*Odontophrynus americanus*  
*Opisthophryne immaculatus*  
*Osteopilus*  
     MORPH: sp  
     DNA: *vastus*  
*Pelobates cultripes*  
*Pelodytes punctatus*  
*Phlyctimantis verrucosus*  
*Phrynobatrachus*  
     MORPH: *acutirostris*  
*Phrynomantis bifasciatus*  
*Phyllomedusa sauvagii*  
*Phyllomedusa vaillantii*  
*Physalaemus biligonigerus*  
*Platyplectrum ornatum*  
*Pleurodema thaul*  
*Pristimantis*  
     MORPH: *huicundo*  
     DNA: *ashkapara* = ***Yunganastes ashkapara***  
*Pseudis paradoxa*  
*Ptychadena mascareniensis*  
*Pyxicephalus adspersus*  
*Rana temporaria*  
*Rhinoderma darwinii*  
*Scaphiopus couchii*  
*Schoutedenella* = ***Arthroleptis***  
     MORPH: *sylvaticus*, *lameerei*, *schubotzi*  
     DNA: *schubotzi*  
*Scinax jolyi*  
*Sooglossus sechellensis*  
*Spea bombifrons*  
*Telmatobius*  
     MORPH: *scrocchii*  
     DNA: *niger*  
*Telmatobufo venustus*  
 †*Thaumastosaurus sulcatus*  
*Thoropa miliaris*  
*Tripurion petasatus*  
 †*Uberabatrachus carvalhoi*  
 †*Wawelia gerholdi*  
*Xenopus laevis*

## Section C. Phenotypic character set used in both the Maximum Parsimony and Bayesian Inference analyses.

Characters are derived from Fabrezi [Section F, reference 2], which were subsequently modified by Evans et al. [Section F, reference 3] and Báez et al. [Section F, reference 4]. Characters potentially related to hyperossification are denoted here with the abbreviation “H”. Character 6 is particularly problematic to interpret and score, especially in hyperossified taxa and was excluded in the phylogenetic analyses.

1. Nasals, medial contact: present (0) or absent (1). **H**
2. Skull, cranial exostosis: absent (0) or present (1). **H**
3. Skull, shape of skull roof in orbital region (i.e., frontoparietal): parallel-sided (0), wider anteriorly (1), or wider posteriorly (2). **H**
4. Skull, minimum width of skull roof in orbital region relative to orbital width: less than 1/4 (0), between 1/4 and 1/3 (1), or more than 1/3 (2). **H**
5. Frontoparietal, nature of midline contact: no medial contact (0), sutured or partially fused (1), or fused along entire length (2). **H**
6. Frontoparietal fenestra, sphenethmoid contribution: completely surrounded anteriorly by sphenethmoid (0) or not completely surrounded anteriorly by sphenethmoid (1).
7. Sphenethmoid, dorsal exposure: absent (0) or present (1). **H**
8. Sphenethmoid, ventral configuration: single (0) or divided (1).
9. Parieto-squamosal arch: absent (0) or present (1). **H**
10. Squamosal, development of otic ramus: absent or rudimentary (0), overlapping crista parotica (1), or overlapping crista parotica and otoccipital (2). **H**
11. Squamosal, development of zygomatic ramus: reduced (0), moderately developed ending free (1), or well developed, articulated with maxilla (2). **H**
12. Premaxillary and maxillary teeth: absent (0) or present (1).
13. Tooth, cusp shape: bicuspid (0) or monocuspid (1). **H**
14. Quadratojugal: absent (0) or present (1).
15. Contact of quadratojugal and maxilla: absent (0) or present (1).
16. Premaxilla, palatine shelf: present (0) or absent (1).
17. Premaxilla, lingual process: absent (0) or present (1).
18. Vomer, teeth: present (0) or absent (1).
19. Vomer, anterior process: reaching maxillary arch (0) or not reaching maxillary arch (1).
20. Palatine as a separate element (neopalatine of Trueb 1993): absent (0) or present (1).
21. Pterygoid, length of anterior ramus: long, reaching antorbital planum (0) or short (1).
22. Pterygoid and parasphenoid, contact: absent (0) or present (1). **H**
23. Parasphenoid, shape of anterior end of cultriform process: serrated or rounded (0), acuminate (1), or notched (2).
24. Parasphenoid, anterior extent of cultriform process: well posterior to level of antorbital plane (0), at level of antorbital plane or slightly posteriorly (1), or anterior to level of antorbital plane (2).
25. Odontoids on lower jaw: absent (0) or present (1). **H**
26. Hyalia, general configuration: complete (0), distally incomplete (1), or proximally incomplete (2).
27. Hyale, anterior processes: absent (0) or present (1).
28. Hyoid plate, anterolateral process: absent (0) or present (1).
29. Hyoid plate, shape of anterolateral process: pointed (0), dilated distally (1), or expanded (2).
30. Hyoid plate, posterolateral process: absent (0) or present (1).
31. Hyoid ossification, posteromedial process: present on cartilaginous stalk (0), abuts directly on hyoid (1), or invades hyoid (2).
32. Parahyoid: absent (0) or present (1).

33. Hyoid plate, calcifications: absent (0) or present (1).
34. Presacral vertebrae, number: eight (0), seven (1), or seven (with 8th fused to sacrum) (2).
35. Atlas vertebrae, cotyle arrangement: fully confluent (Lynch type 3) (0), narrowly separated but distinct (Lynch's type 2) (1), or widely separated (Lynch's type 1) (2).
36. Presacral vertebrae, posterior-most centrum morphology: opisthocoelous (0), procoelous (1), or biconcave (2).
37. Presacral vertebrae, imbrication of posterior-most four neural arches: imbricate (0) or non-imbricate (1).
38. Presacral vertebrae, height of neural spines in anterior presacrals: low (0) or high (1). **H**
39. Presacral vertebrae, orientation of transverse processes of 6<sup>th</sup> presacral: nearly perpendicular to axial axis (0), moderately forward (1), markedly forward (2), or posteriorly inclined (3).
40. Presacral vertebrae, length of transverse processes of posterior presacrals relative to sacral diapophyses: clearly shorter (0) or equal to subequal (1).
41. Presacral vertebrae, uncinat processes on transverse process of third vertebra: present (0) or absent (1).
42. Sacral vertebrae, expansion of diapophyses: widely expanded (length of distal end of sacral rib equal or greater than total width of sacrum) (0), moderately dilated (anterior and posterior margins of sacral rib clearly divergent, distal end of rib flared by comparison with proximal end, but less than total sacral width) (1), or cylindrical (anterior and posterior margins of sacral rib more or less parallel, distal end narrow and similar in diameter to proximal end) (2).  
*This is modified from [S4] which had: "(0) widely expanded (ratio of length of distal end to mediolateral width greater than 1.5); (1) moderately expanded (ratio of distal end to mediolateral width greater than 0.75 but less than 1.5); (2) unexpanded or 'narrow' (ratio of length of distal end to mediolateral width less than 0.75)." This wording is problematic, as the authors presumably mean the total width across the sacrum. However, we measured specimens of three of the taxa that are scored as "0" (i.e. length/width greater than 1.5); they all fell in the "1" category (1.1–1.3, 1.2, 1.1).*
43. Sacrum and urostyle, nature of articulation: bicondylar (0), monocondylar (1), or fused (2).
44. Urostyle, transverse processes: present (0) or absent (1).
45. Urostyle, length relative to presacral column: nearly as long (0), longer (1), or much shorter (2).
46. Free ribs: absent (0) or present (1).
47. Free intervertebral discs in subadults: absent (0) or present (1).
48. Dorsal shield: absent (0) or present (1).
49. Omosternum: absent (0) or present (1).
50. Omosternum, degree of ossification: completely cartilaginous (0) or with ossified style (1).
51. Omosternum, shape of ossified style: proximally forked (0) or proximally unforked (1).
52. Sternum, degree of ossification: completely cartilaginous (0) or with ossified style (1).
53. Sternum, expansion of coracoid relative to its length: less than one half (0) or more than one half (1).
54. Shape of clavicle: curved (0) or straight (1).
55. Clavicle orientation: directed anteriorly (0) or perpendicular to sagittal plane (1).
56. Epicoracoid cartilages in coracoideal region: overlapping (0) or not overlapping (usually extremely reduced) (1).
57. Scapula, maximum diameter of glenoid fossa relative to scapular shaft: more than one (0), between one and one half (1), or less than one half (2).
58. Scapula, anterior lamina: absent (0) or present (1).
59. Clavicle-scapular relation: overlapping anteriorly (0), abutting medially (1), or fused (2).
60. Intercalary elements: absent (0) or present (1).
61. Postaxial carpals (ulnare and distals 5 and 4): all free (0), ulnare free, 5+4 fused (1), or ulnare free, 3+4+5 fused (2).

62. Prepollex: one spherical proximal element (0), two elements, the distal one elongated (1), three or more elements (2), or two elements, the distal one hypermorphic (3).
63. Finger 4, shape of terminal phalanx: straight (0) or curved (1).
64. Finger 4, distal tip of terminal phalanx: simple (slightly knobbed or rounded) (0), notched (1), T-shaped (2), Y - shaped (3), or clearly knobbed (4).
65. Carpal torsion: absent (0) or present (1).
66. Ilium, well-developed dorsal crest on iliac shaft: absent (0) or present (1).
67. Epipubis: absent (0) or present (1).
68. Femoral crest: absent (0) or present (1).
69. Os sesamoides tarsale: absent (0) or present (1).
70. Distal tarsals 3 and 2: free (0) or fused (1).
71. Discrete distal tarsal 1: absent (0) or present (1).
72. Prehallux: one spherical proximal element (0), two elements, the distal one enlongate (1), three or more elements (2), or two elements, the distal one hypermorphic and spade-like (3).
73. Shape of terminal phalanx of toe: straight (0) or curved (1).
74. Distal tip of terminal phalanx of toe: simple (slightly knobbed or rounded) (0), notched (1), T-shaped (2), Y-shaped (3), or clearly knobbed (4).
75. Pupil shape: vertical (0), triangular (1), or horizontal (2).

## Section D. Sensitivity Analyses run.

Files for each sensitivity analysis are available in the Documents section of project page on MorphoBank ([www.morphobank.org/permalink/954](http://www.morphobank.org/permalink/954)). For associated trees see pp.S11–19.

### [BB1.tnt]

**All characters, all taxa except *Uberabatrachus*:**

An initial MP analysis used the full matrix and yielded 63,108 most parsimonious trees.

### [bb4.tnt.beelzebufo.morphology.nohypeross.tnt]

**Sensitivity analysis 1: morphological dataset. No character 6, no *Thaumastosaurus*, no *Cratia*, no hyperossified characters:**

This is the primary morphology-only analysis. Characters associated with hyperossification have been excluded. Results: MPTs=2,648, L=; CI=0.279, RI=0.410. **Fig. S1.**

### [bb4.tnt.beelzebufo.morphology.onlyhypeross.tnt]

**Sensitivity analysis 2: morphological dataset. No character 6, no *Thaumastosaurus*, no *Cratia*, only hyperossified characters:**

This is the primary morphology-only analysis. Only characters associated with hyperossification were used, all other characters were excluded. Results: MPTs=99,999, L=101; CI=0.279, RI=0.410. **Fig. S2.**

### [bb4.tnt.beelzebufo.morphology.noWawelia.tnt]

**Sensitivity analysis 3: morphological dataset. No character 6, no *Thaumastosaurus*, no *Cratia*, no *Wawelia*:**

This is the primary morphology-only analysis with *Wawelia* excluded. Results: MPTs=6,376, L=691; CI=0.152, RI=0.556. **Fig. S3.**

### [bb4.tnt.beelzebufo.morphology.noBaurubatrachus.tnt]

**Sensitivity analysis 4: morphological dataset. No character 6, no *Thaumastosaurus*, no *Cratia*, no *Baurubatrachus*:**



This is the primary morphology-only analysis with *Baurubatrachus* excluded. Results: MPTs=6,376, L=691; CI=0.152, RI=0.556. **Fig. S4.**

[bb4.tnt.beelzebufo.morphology.noWawelia.noBaurubatrachus.tnt]

**Sensitivity analysis 5: morphological dataset. No character 6, no *Thaumastosaurus*, no *Cratia*, no *Wawelia*, no *Baurubatrachus*:**

This is the primary morphology-only analysis with *Wawelia* and *Baurubatrachus* excluded. Results: MPTs=6,376, L=691; CI=0.152, RI=0.556. **Fig. S5.**

[beelzebufo.combined.nohyperossifiedcharacters.tnt]

**Sensitivity analysis 6: combined dataset. No character 6, no *Thaumastosaurus*, no *Cratia*, no hyperossified characters:**

This is the primary combined data analysis. Characters associated with hyperossification have been excluded. Results: MPTs=2,670, L=35,800; CI=0.279, RI=0.410. **Fig. S6.**

[Beelzebufo.combined.noBaurubatrachus.tnt]

**Sensitivity analysis 7: combined dataset. No character 6, no *Thaumastosaurus*, no *Cratia*, no *Baurubatrachus*:**

This is the primary combined data analysis with *Baurubatrachus* excluded. Results: MPTs=24, L=36,014; CI=0.279, RI=0.410. **Fig. S7.**

[Beelzebufo.combined.noWawelia.tnt]

**Sensitivity analysis 8: combined dataset. No character 6, no *Thaumastosaurus*, no *Cratia*, no *Wawelia*:**

This is the primary combined data analysis with *Wawelia* excluded. Results: MPTs=4, L=36014; CI=0.279, RI=0.410. **Fig. S8.**

[Beelzebufo.combined.noWawelia\_noBaurubatrachus.tnt]

**Sensitivity analysis 9: combined dataset. No character 6, no *Thaumastosaurus*, no *Cratia*, no *Wawelia*, no *Baurubatrachus*:**

This is the primary combined data analysis with *Wawelia* and *Baurubatrachus* excluded. Results: MPTs=4, L=36,013; CI=0.279, RI=0.410. **Fig. S9.**

## **Section E. Osteological specimens examined for morphological analysis and comparison.**

Male (M) or female (F) recorded where data available.

**Natural History Museum, London (names in brackets represent old names on specimen labels/catalogue; current names taken from Frost [Section F, reference 1]).**

**Pelobatoidea: Pelobatidae:** *Pelobates cultripes* 1920.1.20.682; *Pelobates cultripes* unnumbered; *Pelobates fuscus* 1920.1.20.680; *Pelobates fuscus* 97.5.8.15 (F); *Pelobates fuscus* 1915.9.15.6; *Pelobates syriacus* 1971.1367; **Scaphiopodidae:** *Scaphiopus holbrookii* (*solitarius*) 233; *Spea* (*Scaphiopus*) *bombifrons* 1964.2063.

**Hyloides: Bufonidae:** *Rhinella* (*Bufo*) *marina* 62.1.9.13; *Rhinella* (*Bufo*) *marina* 63.2.21.10; *Phrynoidis aspera* (*Bufo* ?*asper*) 62.3.20.4 (F); *Amietophrynus* (*Bufo*) *superciliaris*

1906.5.28.14.9 (F); *Amietophrynus (Bufo) mauretanicus* 1920.1.20.676; **Calyptocephalellidae:** *Calyptocephalella gayi* 1920.1.20.3930a (F); *Calyptocephalella gayi* 1920.1.20.3930b (M); *Calyptocephalella gayi* 110a; *Calyptocephalella gayi* 58.8.23.6; **Ceratophryidae:** *Ceratophrys aurita (dorsata)* 1933.11.21.1; *Ceratophrys ornata* 83.4.14.15; **Hylidae:** *Litoria (Cyclorana) australis* 64.7.22.25; *Litoria platycephala (Cyclorana platycephalus)* 1908.5.28.65 (F); *Osteopilus crucialis (Trachycephalus lichenatus)* 12.12.1.1; **Limnodynastidae:** *Helioporus albopunctatus* 1907.3.13.4 (M); *Limnodynastes dorsalis* 96.1.30.8 (M); *Limnodynastes tasmaniensis* 1901.9.13.9 (F); *Neobatrachus (Heleioporus) pictus* RR1937.7.29.10 (M); *Platyplectrum (Limnodynastes) spenceri* 97.10.27.69 (M); **Odontophryniidae:** *Odontophrynus americanus* 85.6.26.41; *Proceratophrys (Ceratophrys) boiei* 1901.7.29.23; **Rhinophryniidae:** *Rhinophrynus dorsalis* 1983.9.25; **Telmatobiidae:** *Telmatobius (Batrachophrynus) brachydactylus* 74.2.3.4; *Telmatobius jelskii* 60.6.16.119.

**Ranoidea:** **Ceratobatrachidae:** *Ceratobatrachus guentheri* 95.12.28.14; **Dicroglossidae:** *Hoplobatrachus tigrinus* unnumbered; **Mantellidae:** *Boophis ('Rhacophorus') madagascariensis* 92.1.21.24 (M); **Microhylidae:** *Glyphoglossus molossus* 1965.1060.61; *Glyphoglossus molossus* 1965.1059 (M); *Kaloula pulchra* 62.1.9.10; *Kaloula pulchra* BM 1983; *Rhombophryne testudo* 86.2.25.33 (F); *Scaphiophryne (Pseudohemisus) madagascariensis* 95.10.29.89; *Uperodon systema* 46.11.22.59; **Ptychadenidae:** *Hildebrandtia ornata budgetti* 1968.950 (F); **Pyxicephalidae:** *Pyxicephalus adspersus* 63.2.21.7; *Pyxicephalus adspersus* 12259 (M).

#### **University of Cambridge Museum of Zoology**

*Ceratophrys ornata* R.1530; *Lepidobatrachus asper* R.1556; *Osteopilus crucialis* Unnumbered; *Osteopilus brunnaus* Unnumbered.

#### **UCL Grant Museum of Zoology**

*Ceratophrys* sp. W186

#### **Los Angeles County Museum**

*Ceratophrys aurita* (catalogued as *C. varia*) LACM 163430 (F).

### **Section F. References cited in Sections A–E.**

1. Frost DR (2013) Amphibian Species of the World: an Online Reference. Version 5.6 (9 January 2013). Electronic Database accessible at <http://research.amnh.org/herpetology/amphibia/index.html>. American Museum of Natural History, New York, USA. Accessed August 2013
2. Fabrezi M (2006) Morphological evolution of the Ceratophryinae (Anura, Neobatrachia). *J Zool Syst Evol Res* 44: 153–166.
3. Evans SE, Jones MEH, Krause DW (2008) A giant frog with South American affinities from the Late Cretaceous of Madagascar. *Proc Natl Acad Sci USA* 105: 2951–2956.
4. Báez AM, Moura GJB, Gómez RO (2009) Anurans from the Lower Cretaceous Crato Formation of northeastern Brazil: implications for the early divergence of neobatrachians. *Cretaceous Res* 30: 829–846.

## Figures for Supporting Information.

**Figure S1. Sensitivity analysis 1: morphological dataset.** No character 6, no *Thaumastosaurus*, no *Cratia*, no hyperossified characters.

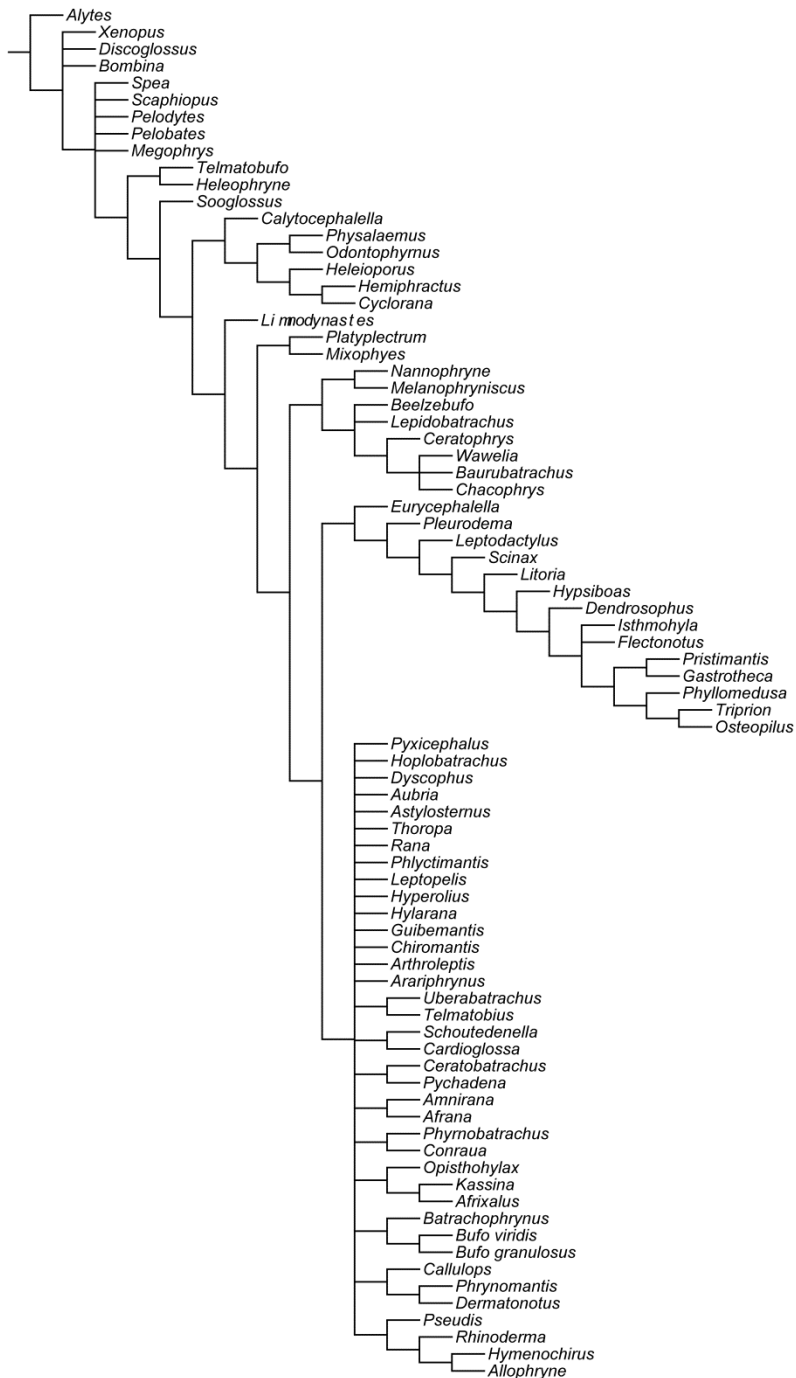

**Figure S2. Sensitivity analysis 2: morphological dataset.** No character 6, no *Thaumastosaurus*, no *Cratia*, only hyperossified characters.

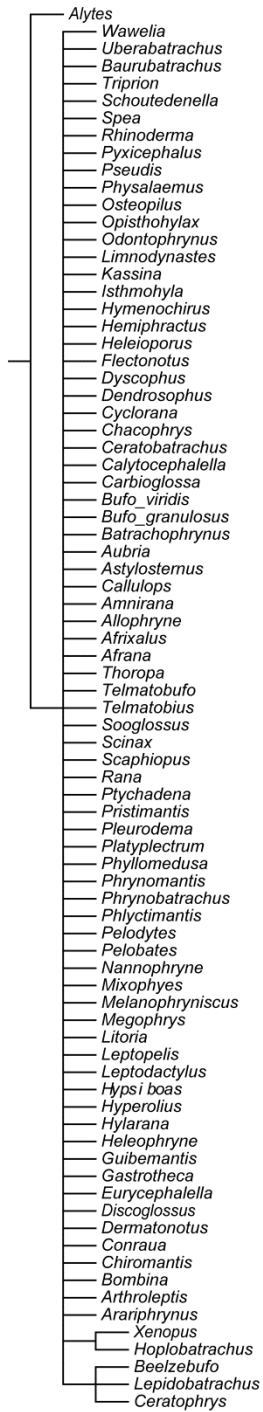

**Figure S3. Sensitivity analysis 3: morphological dataset.** No character 6, no *Thaumastosaurus*, no *Cratia*, no *Wawelia*.

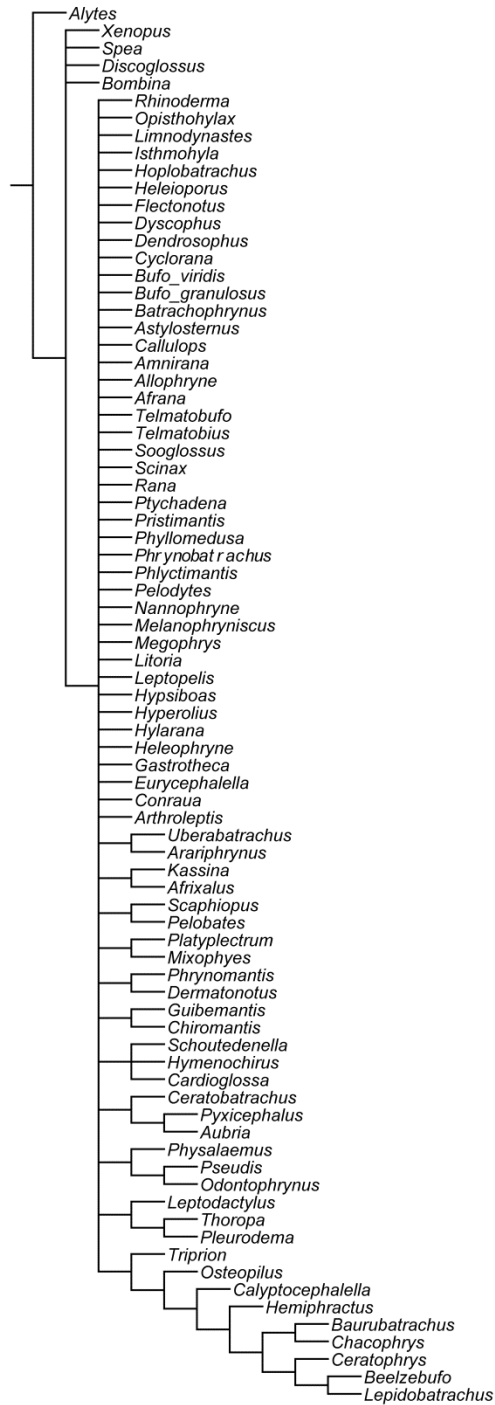

**Figure S4. Sensitivity analysis 4: morphological dataset.** No character 6, no *Thaumastosaurus*, no *Cratia*, no *Baurubatrachus*.

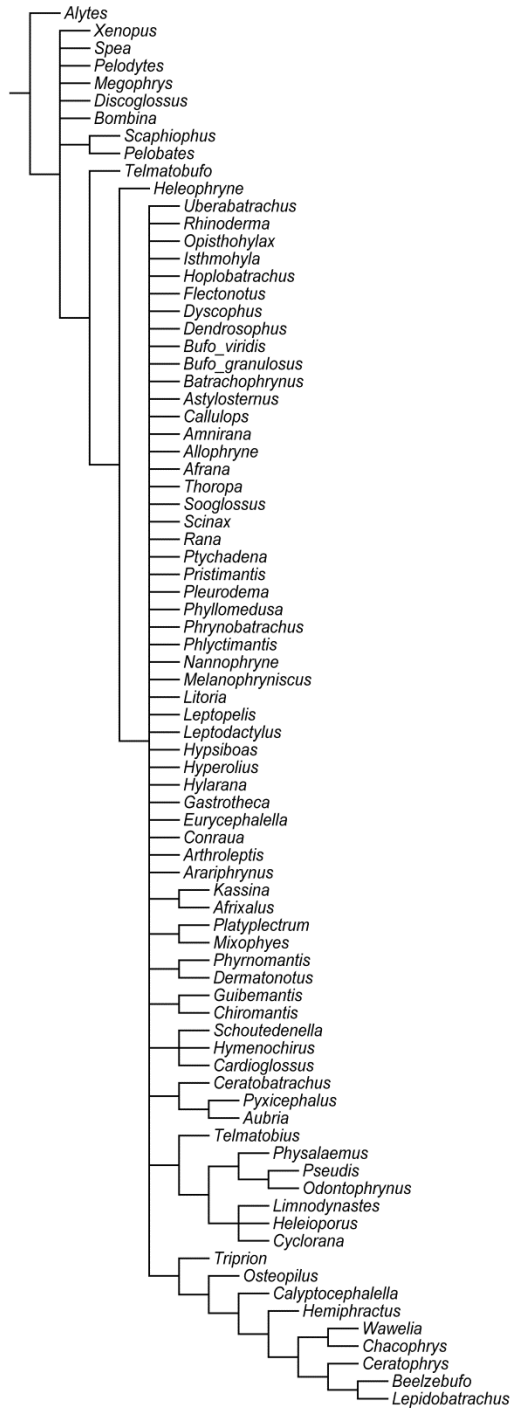

**Figure S5. Sensitivity analysis 5: morphological dataset.** No character 6, no *Thaumastosaurus*, no *Cratia*, no *Wawelia*, no *Baurubatrachus*.

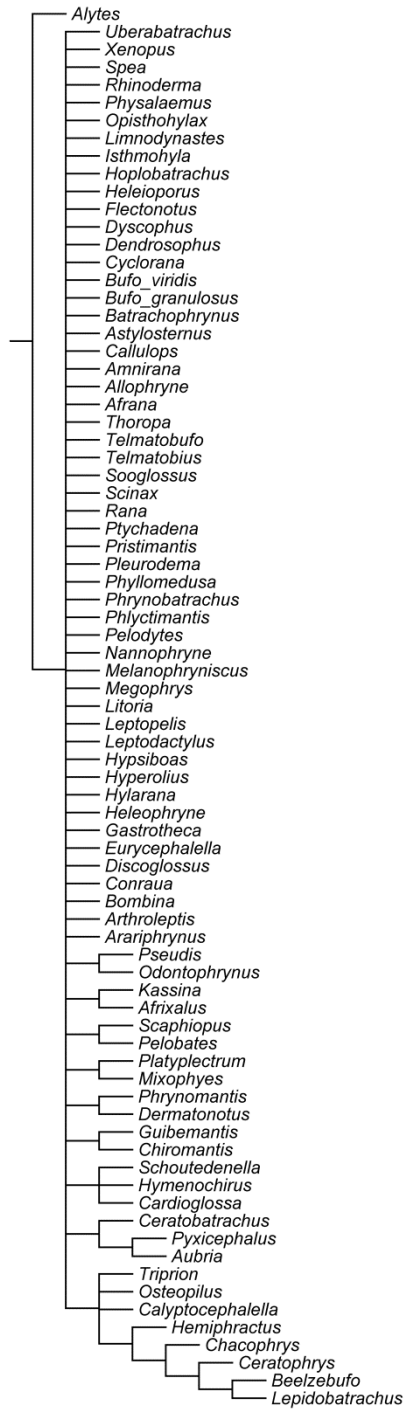

**Figure S6. Sensitivity analysis 6: combined dataset.** No character 6, no *Thaumastosaurus*, no *Cratia*, no hypercrossified characters.

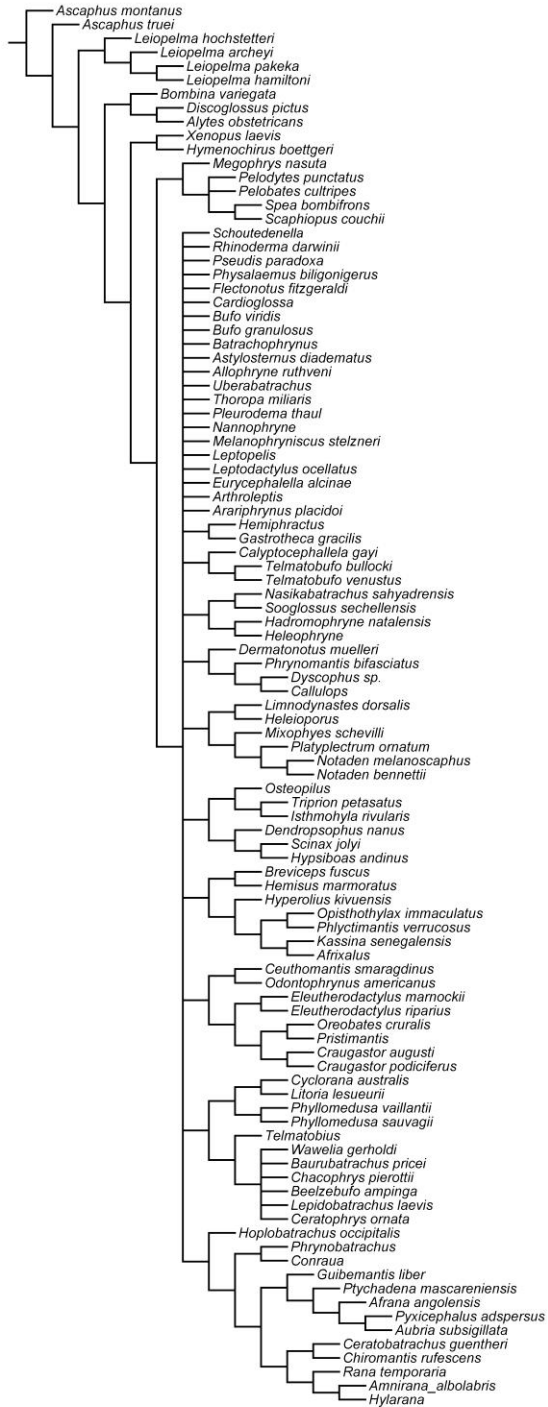



**Figure S7. Sensitivity analysis 7: combined dataset.** No character 6, no *Thaumastosaurus*, no *Cratia*, no *Baurubatrachus*.

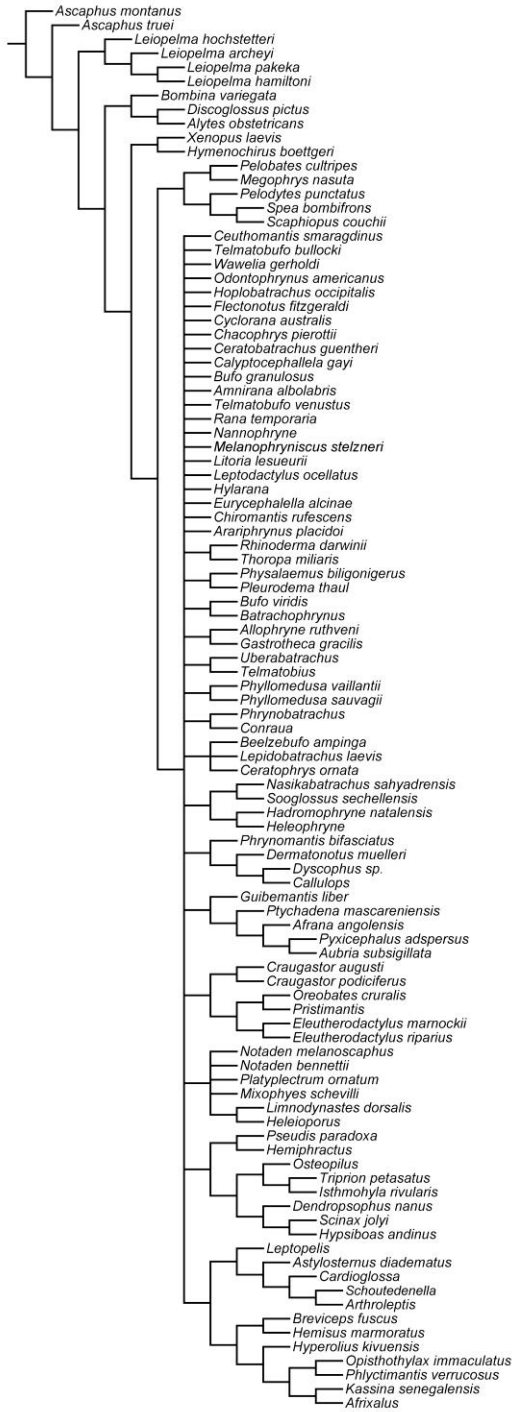

**Figure S8. Sensitivity analysis 8: combined dataset.** No character 6, no *Thaumastosaurus*, no *Cratia*, no *Wawelia*.

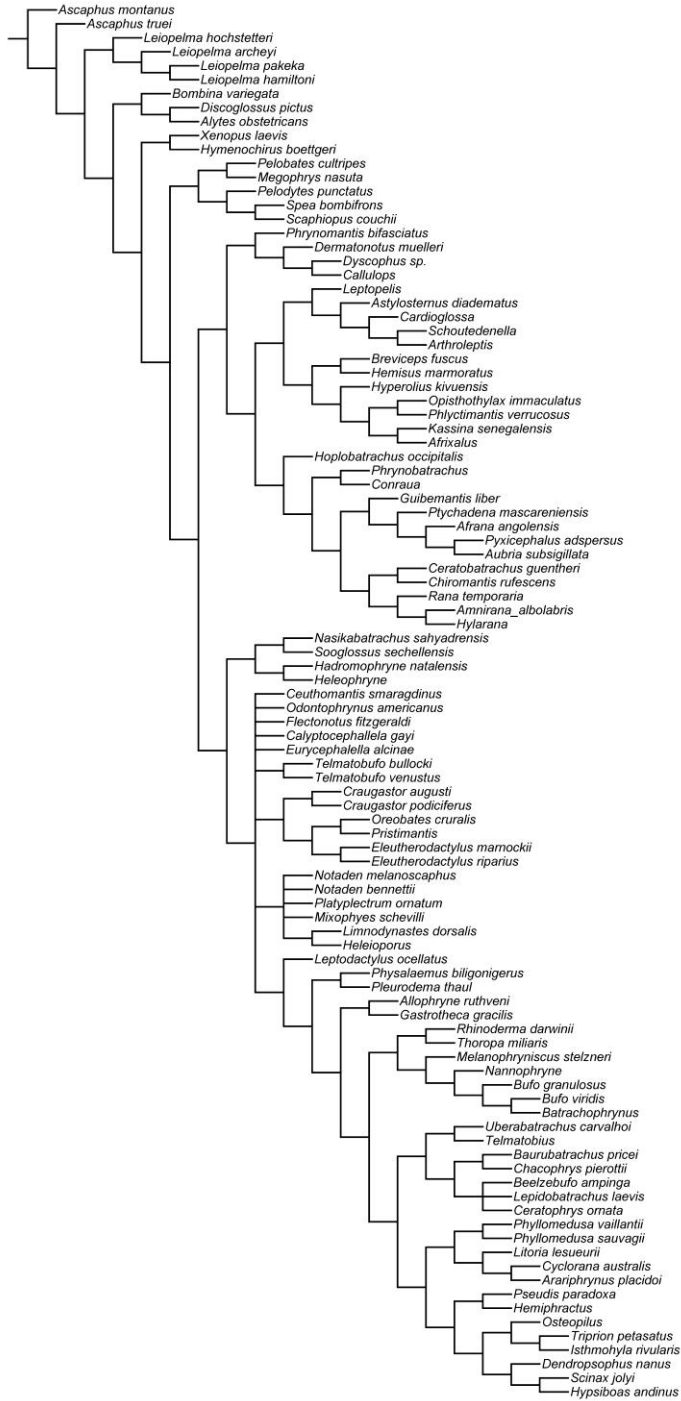

**Figure S9. Sensitivity analysis 9: combined dataset.** No character 6, no *Thaumastosaurus*, no *Cratia*, no *Wawelia*, no *Baurubatrachus*.

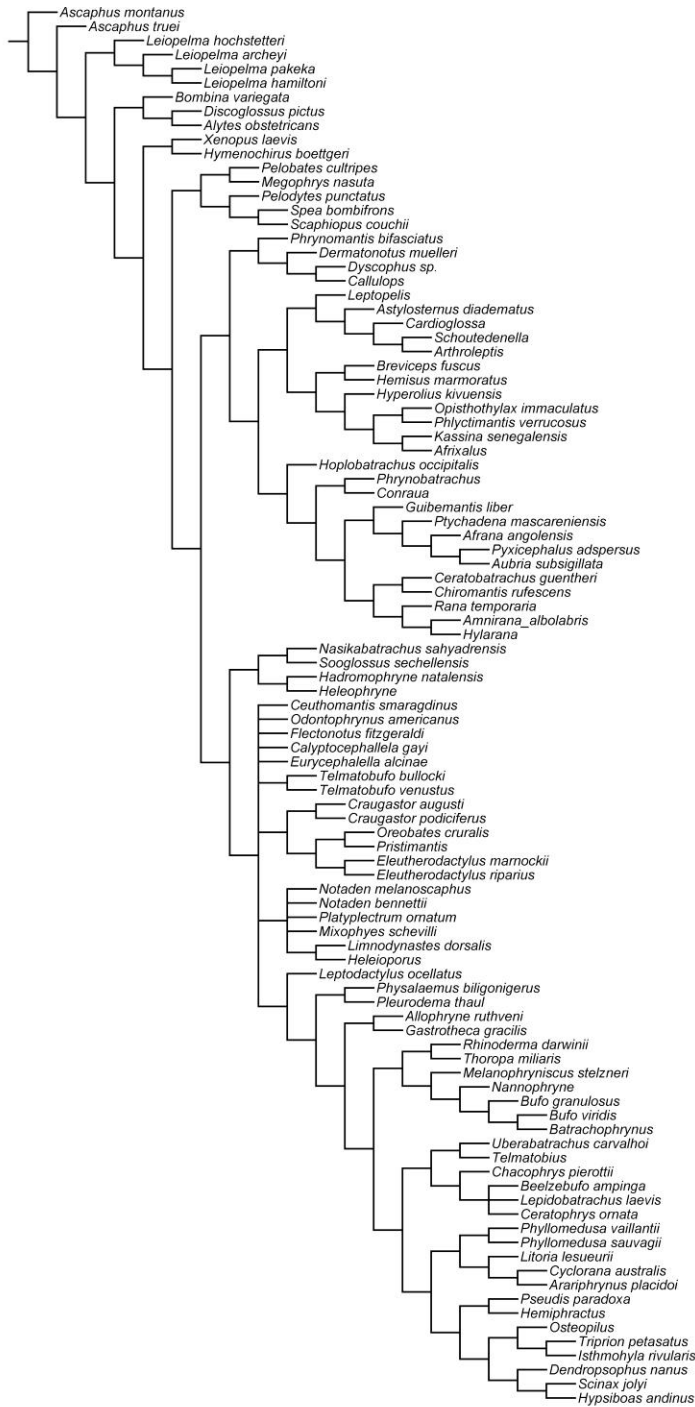

## Tables.

**Table S1. Changes in specimen numbers and identifications from Evans et al. (2008).**

| Original PNAS #(s) | Revised #    | Original identification             | Revised identification                                                   |
|--------------------|--------------|-------------------------------------|--------------------------------------------------------------------------|
| FMNH PR 1959       |              | maxillary process, right squamosal  | partial right quadratojugal                                              |
| FMNH PR 2497       |              | ?midline roofing element            | cranial or vertebral spine table fragment                                |
| FMNH PR 2500       |              | nasal (side indet.)                 | partial posterior process of right quadratojugal                         |
| FMNH PR 2501–2503  | PR 2501      | nasal fragments (side indet.)       | partial right quadratojugal                                              |
| FMNH PR 2508       |              | fragment of ?frontoparietal         | cranial fragment from antorbital margin (nasal or frontoparietal)        |
| FMNH PR 2509       |              | midline cranial element             | conjoined frontoparietal fragment                                        |
| FMNH PR 2512       | FMNH PR 2512 | left frontoparietal                 | left squamosal with facet for frontoparietal in parieto-squamosal bridge |
| FMNH PR 2513       | FMNH PR 2512 | right nasal                         | left quadratojugal, posterior-most portion of posterior process          |
| FMNH PR 2514       | FMNH PR 2512 | nasal (side indet.)                 | cranial fragment                                                         |
| FMNH PR 2515       | FMNH PR 2512 | left squamosal                      | left anterior quadratojugal with part of squamosal suture                |
| FMNH PR 2516       | FMNH PR 2512 | right ?frontoparietal               | fragment of median suture region, ?frontoparietal                        |
| FMNH PR 2517       | FMNH PR 2512 | right frontoparietal                | cranial fragment                                                         |
| FMNH PR 2518       | FMNH PR 2512 | left maxilla                        | facial process of left maxilla including portion of suture with nasal    |
| FMNH PR 2519       | FMNH PR 2512 | left palatoquadrate + quadratojugal | left quadrate sutured to fragment of left quadratojugal                  |
| FMNH PR 2520       | FMNH PR 2512 | indet. cranial part                 | left quadratojugal, dorsal fragment of posterior process                 |
| FMNH PR 2522       | FMNH PR 2512 | part, right nasal                   | cranial or vertebral spine table fragment                                |
| FMNH PR 2523       | FMNH PR 2512 | part, dorsal margin of ?maxilla     | vertebral spine table                                                    |
| FMNH PR 2524       | FMNH PR 2512 | indet. cranial fragment             | cranial fragment                                                         |
| FMNH PR 2525       | FMNH PR 2512 | indet. cranial fragment             | cranial fragment                                                         |
| FMNH PR 2526       | FMNH PR 2512 | part, fused cranial elements        | cranial fragment                                                         |
| FMNH PR 2529       | FMNH PR 2512 | part, ?dorsal shield                | fragment of bony plate (?osteoderm)                                      |
| FMNH PR 2530       | FMNH PR 2512 | part, cranial element               | cranial fragment                                                         |
| FMNH PR 2531       | FMNH PR 2512 | part, cranial element               | cranial fragment                                                         |
| FMNH PR 2536       |              | ?squamosal, otic ramus              | right fused squamosal-quadratojugal flange                               |
| FMNH PR 2537       |              | indet. cranial fragment             | squamosal fragment                                                       |
| UA 9614            |              | maxillary process, right nasal      | posteroventral process of right squamosal                                |
| UA 9615            |              | left frontoparietal                 | cranial fragment from antorbital margin (nasal or frontoparietal)        |
| UA 9617            |              | part of ?squamosal (side indet.)    | posterior-most tip of left quadratojugal                                 |
| UA 9618            |              | ?quadratojugal                      | fragment of left quadratojugal                                           |
| UA 9619            |              | ?part of dorsal shield              | vertebral spine table                                                    |
| UA 9623            |              | left nasal                          | fragment of otic and ventral processes of squamosal                      |
| UA 9624            |              | right nasal                         | posterior process of left quadratojugal                                  |
| UA 9625            |              | maxillary process, right nasal      | posteroventral process of right squamosal                                |
| UA 9626            |              | ?nasal                              | cranial fragment                                                         |
| UA 9627            |              | indet. cranial element              | partial vertebral spine table                                            |
| UA 9628            |              | tibiofibula (side indet.)           | right tibiofibula                                                        |
| UA 9629/9630       | 9629         | left nasal                          | four fragments of left squamosal                                         |
| UA 9631            |              | left nasal                          | fragment of right squamosal suture with frontoparietal                   |

|         |              |                                          |                                                         |
|---------|--------------|------------------------------------------|---------------------------------------------------------|
| UA 9632 |              | ?nasal fragment                          | cranial or vertebral spine table fragment               |
| UA 9633 |              | right frontoparietal                     | ?partial frontoparietal or nasal                        |
| UA 9637 |              | left nasal                               | cranial or vertebral spine table fragment               |
| UA 9638 |              | left nasal                               | otic plate of right squamosal                           |
| UA 9639 |              | maxillary process, left squamosal        | midportion of left quadratojugal                        |
| UA 9674 |              | anterior ramus, right nasal              | posterior process of left quadratojugal                 |
| UA 9676 |              | part of maxilla                          | fragment of right maxilla bearing maxillary nerve canal |
| UA 9677 |              | left frontoparietal                      | fragment of frontoparietal or squamosal                 |
| UA 9678 |              | squamosal, ?possible otic process        | partial vertebral spine table                           |
| UA 9679 |              | possible juvenile quadratojugal          | cranial fragment                                        |
| UA 9680 | FMNH PR 2512 | juvenile squamosal, ?tip of otic process | vertebral spine table                                   |
| UA 9681 |              | ?part of right ilium                     | <i>Madtsia madagascariensis</i> proximal rib            |

Changes to museum catalogue numbers and identifications as published in: Evans SE, Jones MEH, Krause DW (2008). A giant frog with South American affinities from the Late Cretaceous of Madagascar. *Proc Natl Acad Sci USA* 105: 2951–2956. Institutional Abbreviations: FMNH, The Field Museum, Chicago, Illinois, U. S. A.; UA, Université d'Antananarivo, Antananarivo, Madagascar.

**Table S2. *Beelzebufo* specimens used in the skeleton and skull reconstructions.**

| Specimen #                 | Identification                                | Transformations                                                       | Model position(s)                                                                         |
|----------------------------|-----------------------------------------------|-----------------------------------------------------------------------|-------------------------------------------------------------------------------------------|
| FMNH PR 2512<br>cranium    | partial posterior cranium                     | mirrored portions of posterior cranium, pars facialis of left maxilla | posterior cranium and portions of pars facialis of right and left maxillae                |
| FMNH PR 2512<br>Vertebra A | presacral vertebra                            | none                                                                  | presacral vertebra 4                                                                      |
| FMNH PR 2512<br>Vertebra B | partial spinous process of presacral vertebra | mirrored along midline                                                | spinous process of presacral vertebra 5                                                   |
| FMNH PR 2512<br>urostyle   | partial urostyle                              | none                                                                  | proximal right cotyle of urostyle                                                         |
| FMNH PR 2507               | pars facialis of right maxilla                | mirrored                                                              | pars facialis of left and right maxillae                                                  |
| FMNH PR 2510               | anterior portion of left maxilla              | mirrored; cloned and mirrored portions of tooth row                   | left and right maxillae; portions of tooth row of left and right maxillae and premaxillae |
| UA 9615                    | partial right nasal or left frontoparietal    | mirrored                                                              | posterior portions of left and right nasals                                               |
| UA 9621                    | anterior portion of right quadratojugal       | mirrored                                                              | anterior portion of left and right quadratojugals                                         |
| UA 9951                    | anterior portion of left nasal                | mirrored                                                              | anterior portion of left and right nasals                                                 |
| UA 9600                    | fused atlas and second presacral vertebrae    | reduced isometrically (0.955296) to scale of FMNH PR 2512             | centra of atlas and presacral vertebra 2                                                  |
| UA 9947                    | presacral vertebra                            | increased isometrically (1.06305)                                     | presacral vertebra 3                                                                      |
| FMNH PR 2300               | sacral vertebra                               | mirrored along midline                                                | sacral vertebra                                                                           |
| UA 9636                    | urostyle                                      | none                                                                  | urostyle                                                                                  |
| UA 9628                    | right tibiofibula                             | none                                                                  | right tibiofibula                                                                         |
| UA 9957                    | right tibiale-fibulare                        | none                                                                  | right tibiale-fibulare                                                                    |

**Table S3. Axial column element lengths of representative anuran taxa.**

| Taxon                                 | Catalogue #             | Atlas<br>(mm)    | PS2<br>(mm) | PS3<br>(mm) | PS4<br>(mm) | PS5<br>(mm) | PS6<br>(mm) | PS7<br>(mm) | PS8<br>(mm) | Sacral<br>(mm) | Total<br>presacral<br>series<br>(mm) | Urostyle<br>(mm) |
|---------------------------------------|-------------------------|------------------|-------------|-------------|-------------|-------------|-------------|-------------|-------------|----------------|--------------------------------------|------------------|
| <i>Amietophrynus mauretanicus</i>     | BMNH 1920.1.20.676      | 3.4              | 2.5         | 2.8         | 2.8         | 2.8         | 3.2         | 3           | 3.2         | 1.9            | 25.6                                 | 22.1             |
| <i>Amietophrynus superciliaris</i>    | BMNH 1906.5.28.14.9     | 6.9              | 5           | 7.3         | 6.95        | 6.9         | 6.2         | 6.2         | 6.5         | 3.35           | 55.3                                 | 46.5             |
| <i>Boophis madagascariensis</i>       | BMNH 92.1.21.24         | 2.6              | 2.1         | 2.4         | 2.5         | 2.5         | 2.5         | 2.5         | 2.8         | 1.6            | 21.5                                 | 20.7             |
| <i>Calyptocephalella gayi</i>         | BMNH 110                | 7                | 5           | 5.8         | 6.1         | 6.1         | 5           | 4.5         | 5.3         | 4              | 48.8                                 | 49.2             |
| <i>Calyptocephalella gayi</i>         | BMNH<br>1920.1.20.3930F | 9                | 6.2         | 6.3         | 7.4         | 7.4         | 6.6         | 6.7         | 6.7         | 4.8            | 61.1                                 | 52               |
| <i>Calyptocephalella gayi</i>         | BMNH<br>1920.1.20.3930M | 5.9              | 4.8         | 4.8         | 4.8         | 5.2         | 4.6         | 4.4         | 5           | 3              | 42.5                                 | 39.4             |
| <i>Ceratobatrachus guentheri</i>      | BMNH 95.12.28.14        | 2.5              | 1.8         | 2.2         | 2.4         | 2.4         | 2           | 2.2         | 2           | 1.4            | 18.9                                 | 22.6             |
| <i>Ceratophrys aurita</i>             | LACM 163430             | 16               | 7.8         | 9.6         | 11          | 11          | 11          | 8.8         | 8.6         | 6.7            | 90.5                                 | 42.3             |
| <i>Glyphoglossus molossus</i>         | BMNH 1965.1060.61       | 2.8              | 2           | 2.3         | 2.9         | 2.9         | 2.9         | 2.9         | 3.7         | 1              | 23.4                                 |                  |
| <i>Glyphoglossus molossus</i>         | BMNH 1965.1059          | 2.9              | 2.2         | 2.4         | 2.6         | 2.9         | 2.9         | 3.4         | 3.4         | 1.5            | 24.2                                 | 18               |
| <i>Helioporus allopunctatus</i>       | BMNH 1907.3.13.9        | 4 <sup>1</sup>   |             | 3.2         | 2.6         | 2.8         | 2.8         | 2.8         | 2.8         | 1.8            | 22.8                                 | 19               |
| <i>Hildebrandtia ornata</i>           | BMNH 1968.950           | 4.2 <sup>1</sup> |             | 2.3         | 2.3         | 2.4         | 2.4         | 2.4         |             | 2              | 18                                   | 18.9             |
| <i>Hoplobatrachus tigrinus</i>        | BMNH Uncat.             | 6.2              | 4.2         | 5           | 6           | 5.6         | 5.6         | 5.8         | 5.5         | 3.35           | 47.3                                 | 42.4             |
| <i>Kaloula pulchra pulchra</i>        | BMNH 62.1.9.10          | 2.6              | 2.3         | 2.3         | 2.9         | 3.3         | 3.2         | 3.4         | 3.2         | 2.3            | 25.5                                 |                  |
| <i>Kaloula pulchra pulchra</i>        | BMNH 1983               | 2.9              | 2.5         | 2.5         | 3           | 3.4         | 3.3         | 3.4         | 3.4         | 2.2            | 35.6                                 | 19.8             |
| <i>Limnodynastes dorsalis</i>         | BMNH 96.1.30.8          | 2.7 <sup>1</sup> |             | 1.8         | 1.9         | 1.9         | 1.5         | 1.7         | 1.7         | 1.4            | 14.6                                 | 15.9             |
| <i>Limnodynastes tasmaniensis</i>     | BMNH 1901.9.13.9        | 2 <sup>1</sup>   |             | 1.4         | 1.2         | 1.4         | 1.5         | 1.5         | 1.5         | 1              | 11.5                                 | 10.5             |
| <i>Litoria australis</i>              | BMNH 64.7.22.25         | 3.7              | 3           | 3.4         | 3.4         | 4           | 3.6         | 2.4         | 2           | 2.7            | 28.2                                 | 25.4             |
| <i>Litoria playcephalus</i>           | BMNH 1908.5.28.65       | 2.8              | 2.5         | 2.6         | 2.8         | 2.8         | 2.8         | 2.8         | 2.5         | 1.6            | 23.2                                 |                  |
| <i>Neobatrachus pictus</i>            | BMNH 1937.7.29.10       | 3.3              |             | 2.2         | 1.8         | 1.9         | 1.9         | 1.9         | 1.9         | 1.2            | 16.1                                 | 12.4             |
| <i>Pelobates cultripes</i>            | BMNH 1920.1.20.682      | 3.6              | 2.5         | 2.9         | 3.2         | 3.2         | 3.4         | 3.5         | 3.4         | 2.3            | 28                                   | 15.7             |
| <i>Pelobates fuscus</i>               | BMNH 1920.1.20.680      | 2.8              | 2.1         | 2.3         | 2.4         | 2.9         | 2.5         | 2.5         | 2.8         | 1.7            | 22                                   | 11.9             |
| <i>Pelobates fuscus</i>               | BMNH 1915.9.15.6        | 2.9              | 1.9         | 2.3         | 2.4         | 2.55        | 2.6         | 2.7         | 2.3         | 2              | 21.6                                 | 12.3             |
| <i>Phrynoidis asper</i>               | BMNH 62.3.20.4          | 5.5              | 4.4         | 5           | 5.4         | 5.6         | 5.4         | 6           | 4.4         | 3.5            | 45.1                                 | 37.2             |
| <i>Platyplectrum spenceri</i>         | BMNH 97.10.27.69        | 2.6 <sup>1</sup> |             | 1.7         | 1.4         | 1.4         | 1.4         | 1.4         | 1.5         | 0.8            | 12.2                                 | 10               |
| <i>Rhinella marina</i>                | BMNH 62.1.9.13          | 5.6              | 4.2         | 4.9         | 5.2         | 4.6         | 4.7         | 5.1         | 4.7         | 3.2            | 42.1                                 | 32               |
| <i>Rhombophryne testudo</i>           | BMNH 86.2.25.33         | 2.1              | 1.5         | 1.6         | 1.6         | 1.6         | 1.6         | 1.6         | 1.9         | 1.4            | 14.9                                 | 16.6             |
| <i>Scaphiophryne madagascariensis</i> | BMNH 95.10.29.89        | 1.2              | 1.2         | 1.5         | 1.8         | 1.7         | 2           | 2           | 2           | 1.2            | 14.6                                 |                  |
| <i>Scaphiopus holbrookii</i>          | BMNH 233                | 3.5              | 1.5         | 2.3         | 3           | 3.6         | 3.3         | 3.8         | 3.5         | 2.8            | 27.3                                 | 13.6             |
| <i>Uperodon systema</i>               | BMNH 46.11.22.59        | 3.2              | 2.1         | 2.4         | 2.8         | 3           | 3.6         | 3.4         | 3.2         | 2              | 25.7                                 | 17               |

<sup>1</sup>Atlas and second presacral vertebrae are fused without obvious suture. Length given under atlas includes length of second presacral. Empty cells indicate missing, obscured, or damaged elements that could not be measured

**Table S4. Measurements and proportions of tibiofibula and tibiale-fibulare of representative anuran taxa.**

| Taxon                                    | Catalogue #/source             | Length of tibiofibula (mm) | Length of fibulare (mm) | Tibiofibula/fibulare | Tibiale-fibulare proximal width (mm) | Tibiale-fibulare distal width (mm) | Tibiale-fibulare proximal/distal width | Tibiale-fibulare length/distal width | Length of centrum of presacral 4 (mm) | Length of fibulare/length of centrum PS4 | Length of tibiofibula/length of PS4 centrum |
|------------------------------------------|--------------------------------|----------------------------|-------------------------|----------------------|--------------------------------------|------------------------------------|----------------------------------------|--------------------------------------|---------------------------------------|------------------------------------------|---------------------------------------------|
| <i>Beelzebufo</i> (tibia as preserved)   | UA 9628 & UA 9957 <sup>1</sup> | 51.3                       | 24.6                    |                      | 11.1                                 | 14.2                               | 0.78                                   |                                      | 7.7                                   |                                          |                                             |
| <i>Beelzebufo</i> (tibia ends estimated) | UA 9628 & UA 9957 <sup>1</sup> | 56–62                      | 28–30                   | 1.86–2.21            | 11.1                                 | 14.2                               | 0.78                                   | 2.00–2.11                            | 7.7                                   | 3.64–3.90                                | 7.27–8.05                                   |
| <i>Amietophrynus mauretanicus</i>        | BMNH 1920.1.20.676             | 24.2                       | 13.7                    | 1.77                 | 5.3                                  | 5.3                                | 1.00                                   | 2.58                                 | 2.8                                   | 4.89                                     | 8.64                                        |
| <i>Amietophrynus superciliaris</i>       | BMNH 1906.5.28.14.9F           | 48.4                       | 27                      | 1.79                 | 9.3                                  | 9.3                                | 1.00                                   | 2.90                                 | 7                                     | 3.86                                     | 6.91                                        |
| <i>Boophis madagascariensis</i>          | BMNH 92.1.21.24                | 39                         | 20.5                    | 1.90                 | 3.6                                  | 3.3                                | 1.09                                   | 6.21                                 | 2.5                                   | 8.20                                     | 15.60                                       |
| <i>Calyptocephalella gayi</i>            | BMNH 111a                      | 45                         | 25.6                    | 1.76                 | 8.9                                  | 11.2                               | 0.79                                   | 2.29                                 | 6.1                                   | 4.20                                     | 7.38                                        |
| <i>Calyptocephalella gayi</i>            | BMNH 1920.1.20.3930F           | 50.5                       | 28.8                    | 1.75                 | 11.7                                 | 14                                 | 0.84                                   | 2.06                                 | 7.4                                   | 3.89                                     | 6.82                                        |
| <i>Calyptocephalella gayi</i>            | BMNH 1920.1.20.3930M           | 40                         | 22.9                    | 1.75                 | 9.3                                  | 10.4                               | 0.89                                   | 2.20                                 | 4.8                                   | 4.77                                     | 8.33                                        |
| <i>Ceratobatrachus guentheri</i>         | BMNH 95.12.28.14               | 28.9                       | 14                      | 2.06                 | 4.3                                  | 3.9                                | 1.10                                   | 3.59                                 | 3.4                                   | 4.12                                     | 8.50                                        |
| <i>Ceratophrys aurita</i>                | LACM 163430                    | 54.6                       | 33.2                    | 1.64                 | 14.8                                 | 14.4                               | 1.03                                   | 2.31                                 | 6.4                                   | 5.19                                     | 8.53                                        |
| <i>Glyphoglossus molossus</i>            | BMNH 1965.1059M                | 21.5                       | 8.2                     | 2.62                 | 7                                    | 6.5                                | 1.08                                   | 1.26                                 | 2.6                                   | 3.15                                     | 8.27                                        |
| <i>Glyphoglossus molossus</i>            | BMNH 1965.1060.61              | 21.6                       | 9.4                     | 2.30                 | 7.2                                  | 7.2                                | 1.00                                   | 1.31                                 | 2.9                                   | 3.24                                     | 7.45                                        |
| <i>Heleioporus allopunctatus</i>         | BMNH 1907.3.13.4M              | 22.8                       | 11.9                    | 1.92                 | 6                                    | 7.2                                | 0.83                                   | 1.65                                 | 2.6                                   | 4.58                                     | 8.77                                        |
| <i>Hildebrandtia ornata</i>              | BMNH 1968.950F                 | 25                         | 12.4                    | 2.02                 | 4                                    | 4.5                                | 0.89                                   | 2.76                                 | 2.4                                   | 5.17                                     | 10.42                                       |
| <i>Hoplobatrachus tigrinus</i>           | BMNH Uncat.                    | 67.5                       | 33.7                    | 2.00                 | 11                                   | 12                                 | 0.92                                   | 2.81                                 | 6                                     | 5.62                                     | 11.25                                       |
| <i>Kaloula pulchra pulchra</i>           | BMNH 62.1.9.10                 | 18.8                       | 10.4                    | 1.81                 | 4.4                                  | 5.4                                | 0.81                                   | 1.93                                 | 2.9                                   | 3.59                                     | 6.48                                        |
| <i>Kaloula pulchra pulchra</i>           | BMNH 1983                      | 18.6                       | 10.1                    | 1.84                 | 4.4                                  | 4.6                                | 0.96                                   | 2.20                                 | 3                                     | 3.37                                     | 6.20                                        |
| <i>Limnodynastes dorsalis</i>            | BMNH 96.1.30.8M                | 20.5                       | 10.4                    | 1.97                 | 3.8                                  | 4.2                                | 0.90                                   | 2.48                                 | 1.9                                   | 5.47                                     | 10.79                                       |
| <i>Limnodynastes tasmaniensis</i>        | BMNH 1901.9.13.9               | 13.6                       | 7                       | 1.94                 | 2.7                                  | 3.1                                | 0.87                                   | 2.26                                 | 1.2                                   | 5.83                                     | 11.33                                       |
| <i>Litoria australis</i>                 | BMNH 64.7.22.25                | 34.2                       | 17.6                    | 1.94                 | 6                                    | 5.4                                | 1.11                                   | 3.26                                 | 3.4                                   | 5.18                                     | 10.06                                       |
| <i>Litoria platycephala</i>              | BMNH 1908.5.28.65F             | 22.7                       | 11.45                   | 1.98                 | 4.7                                  | 5.1                                | 0.92                                   | 2.25                                 | 2.8                                   | 4.09                                     | 8.11                                        |
| <i>Neobatrachus pictus</i>               | BMNH 1937.7.29.10M             | 17.2                       | 9.7                     | 1.77                 | 4.8                                  | 5.3                                | 0.91                                   | 1.83                                 | 1.8                                   | 5.39                                     | 9.56                                        |
| <i>Osteopilus crucialis</i>              | UCZM R.Uncat.                  | 49                         | 27.7                    | 1.77                 | 5.4                                  | 5                                  | 1.08                                   | 5.54                                 | 4.7                                   | 5.89                                     | 10.43                                       |
| <i>Pelobates cultripes</i>               | BMNH 1920.1.20.682             | 26.3                       | 13.4                    | 1.96                 | 6.3                                  | 8                                  | 0.79                                   | 1.68                                 | 3.2                                   | 4.19                                     | 8.22                                        |
| <i>Pelobates cultripes</i>               | BMNH Uncat.                    | 24.6                       | 12.7                    | 1.94                 | 6                                    | 8.4                                | 0.71                                   | 1.51                                 |                                       |                                          |                                             |
| <i>Pelobates fuscus</i>                  | BMNH 1920.1.20.680             | 18.8                       | 9.2                     | 2.04                 | 4.6                                  | 6                                  | 0.77                                   | 1.53                                 | 2.4                                   | 3.83                                     | 7.83                                        |
| <i>Pelobates fuscus</i>                  | BMNH 97.5.8.15                 | 18.1                       | 9.3                     | 1.95                 | 4.5                                  | 6.1                                | 0.74                                   | 1.52                                 | 2.4                                   | 3.88                                     | 7.54                                        |
| <i>Pelobates fuscus</i>                  | BMNH 1915.9.15.6               | 18.2                       | 9.8                     | 1.86                 | 4.6                                  | 5.3                                | 0.87                                   | 1.85                                 | 2.4                                   | 4.08                                     | 7.58                                        |
| <i>Phrynoidis asper</i>                  | BMNH 62.3.20.4                 | 43.5                       | 23.4                    | 1.86                 | 9                                    | 9.2                                | 0.98                                   | 2.54                                 | 5.4                                   | 4.33                                     | 8.06                                        |
| <i>Platyplectrum spenceri</i>            | BMNH 97.10.27.69M              | 14.3                       | 7.1                     | 2.01                 | 2.4                                  | 3                                  | 0.80                                   | 2.37                                 | 1.4                                   | 5.07                                     | 10.21                                       |
| <i>Pyxicephalus adspersus</i>            | BMNH 63.2.21.7                 | 50.4                       | 22.1                    | 2.28                 | 12.2                                 | 13                                 | 0.94                                   | 1.70                                 | 6                                     | 3.68                                     | 8.40                                        |
| <i>Pyxicephalus adspersus</i>            | BMNH 12259M                    | 21.4                       | 10.5                    | 2.04                 | 4.9                                  | 5                                  | 0.98                                   | 2.10                                 | 2.6                                   | 4.04                                     | 8.23                                        |
| <i>Rhinella marina</i>                   | BMNH 62.1.9.13                 | 46.3                       | 25                      | 1.85                 | 8.2                                  | 9.2                                | 0.89                                   | 2.72                                 | 5.2                                   | 4.81                                     | 8.90                                        |



|                                       |                        |             |             |             |            |            |             |             |            |              |              |
|---------------------------------------|------------------------|-------------|-------------|-------------|------------|------------|-------------|-------------|------------|--------------|--------------|
| <i>Rhinella marina</i>                | BMNH 63.2.12.10        | 46.5        | 26.6        | 1.75        | 9          | 9.6        | 0.94        | 2.77        | 5.9        | 4.51         | 7.88         |
| <i>Rhinophrynus dorsalis</i>          | BMNH 1983.925          | 13.8        | 5.5         | 2.51        | 6.3        | 6.7        | 0.94        | 0.82        | 1.5        | 3.67         | 9.20         |
| <i>Rhombophryne testudo</i>           | BMNH 86.2.25.33F       | 14.1        | 7.2         | 1.96        | 3.7        | 4          | 0.93        | 1.80        | 1.6        | 4.50         | 8.81         |
| <i>Scaphiophryne madagascariensis</i> | BMNH 95.10.29.89       | 13.8        | 7.1         | 1.94        | 3          | 2.6        | 1.15        | 2.73        | 1.8        | 3.94         | 7.67         |
| <i>Spea bombifrons</i>                | BMNH 1964.2063         | 15          | 6.5         | 2.31        | 3.7        | 4.3        | 0.86        | 1.51        |            |              |              |
| <i>Rhombophryne testudo</i>           | BMNH 86.2.25.33F       | 14.1        | 7.2         | 1.96        | 3.7        | 4          | 0.93        | 1.80        | 1.6        | 4.50         | 8.81         |
| <i>Uperodon systoma</i>               | BMNH 46.11.22.59       | 18.9        | 9.6         | 1.97        | 4.5        | 5          | 0.90        | 1.92        | 2.8        | 3.43         | 6.75         |
| <i>Buergeria oxycephalus</i>          | Digimorph <sup>2</sup> | <i>104</i>  | <i>43</i>   | <i>2.42</i> | <i>9.5</i> | <i>9.5</i> | <i>1.00</i> | <i>4.53</i> | <i>7</i>   | <i>6.14</i>  | <i>14.86</i> |
| <i>Ceuthomantis smaraginus</i>        | Digimorph <sup>2</sup> | <i>50</i>   | <i>32.8</i> | <i>1.52</i> | <i>5.7</i> | <i>5</i>   | <i>1.14</i> | <i>6.56</i> | <i>3</i>   | <i>10.93</i> | <i>16.67</i> |
| <i>Chrixalus idioticus</i>            | Digimorph <sup>2</sup> | <i>74.3</i> | <i>39.3</i> | <i>1.89</i> | <i>8.6</i> | <i>8.6</i> | <i>1.00</i> | <i>4.57</i> | <i>6.4</i> | <i>6.14</i>  | <i>11.61</i> |
| <i>Chiromantis rufescens</i>          | Digimorph <sup>2</sup> | <i>92.3</i> | <i>47</i>   | <i>1.96</i> | <i>10</i>  | <i>8</i>   | <i>1.25</i> | <i>5.88</i> | <i>7.4</i> | <i>6.35</i>  | <i>12.47</i> |
| <i>Gastrophryne usta</i>              | Digimorph <sup>2</sup> | <i>49.6</i> | <i>25.5</i> | <i>1.95</i> | <i>9.4</i> | <i>10</i>  | <i>0.94</i> | <i>2.55</i> | <i>4.2</i> | <i>6.07</i>  | <i>11.81</i> |
| <i>Hamptophryne boliviana</i>         | Digimorph <sup>2</sup> | <i>48.2</i> | <i>24.2</i> | <i>1.99</i> | <i>7.2</i> | <i>8.2</i> | <i>0.88</i> | <i>2.95</i> | <i>3.6</i> | <i>6.72</i>  | <i>13.39</i> |
| <i>Incilius periglenes</i>            | Digimorph <sup>2</sup> | <i>39</i>   | <i>25</i>   | <i>1.56</i> | <i>7</i>   | <i>8</i>   | <i>0.88</i> | <i>3.13</i> | <i>4.3</i> | <i>5.81</i>  | <i>9.07</i>  |
| <i>Ischnocema guentheri</i>           | Digimorph <sup>2</sup> | <i>62.9</i> | <i>30</i>   | <i>2.10</i> | <i>6.4</i> | <i>5.8</i> | <i>1.10</i> | <i>5.17</i> | <i>3.3</i> | <i>9.09</i>  | <i>19.06</i> |
| <i>Nyctixalus pictus</i>              | Digimorph <sup>2</sup> | <i>103</i>  | <i>53</i>   | <i>1.94</i> | <i>9</i>   | <i>9</i>   | <i>1.00</i> | <i>5.89</i> | <i>7.7</i> | <i>6.88</i>  | <i>13.38</i> |
| <i>Philautus femoralis</i>            | Digimorph <sup>2</sup> | <i>92</i>   | <i>56</i>   | <i>1.64</i> | <i>9</i>   | <i>9.2</i> | <i>0.98</i> | <i>6.09</i> | <i>7</i>   | <i>8.00</i>  | <i>13.14</i> |
| <i>Polypedates leucomystax</i>        | Digimorph <sup>2</sup> | <i>99</i>   | <i>41</i>   | <i>2.41</i> | <i>11</i>  | <i>8.7</i> | <i>1.26</i> | <i>4.71</i> | <i>7.7</i> | <i>5.32</i>  | <i>12.86</i> |
| <i>Rhacophorus reinardtii</i>         | Digimorph <sup>2</sup> | <i>94</i>   | <i>40</i>   | <i>2.35</i> | <i>9</i>   | <i>9.4</i> | <i>0.96</i> | <i>4.26</i> | <i>7.3</i> | <i>5.48</i>  | <i>12.88</i> |
| <i>Theloderma stellatum</i>           | Digimorph <sup>2</sup> | <i>87</i>   | <i>42</i>   | <i>2.07</i> | <i>9</i>   | <i>9.4</i> | <i>0.96</i> | <i>4.47</i> | <i>7.3</i> | <i>5.75</i>  | <i>11.92</i> |

<sup>1</sup> Elements are not from same individual and therefore proportions are only indicative; applies also to PS4 (FMNH PR 2512).

<sup>2</sup> Unscaled measurements taken from the Digimorph website, University of Texas ([www.digimorph.org](http://www.digimorph.org)). Italicized measurements have no units and are for proportional comparisons only.

Empty cells indicate skeletal element either not preserved or damaged. Length of fibulare/distal width differentiates saltators (high values) from specialised burrowers (low values). Estimated proportion for *Beelzebufo* resembles living anurans that walk and sometimes burrow. Saltators also have relatively longer tibiofibulae and ankle bones.

**Table S5. Skull measurements and proportions of representative anuran taxa.**

| Taxon                              | Catalogue number               | Skull midline length (mm) | Skull bi-quadrata width (mm) | Trans-condylar width (mm) | Skull midline length/ bi-quadrata width | Bi-quadrata width/ transcondylar width |
|------------------------------------|--------------------------------|---------------------------|------------------------------|---------------------------|-----------------------------------------|----------------------------------------|
| <i>Beelzebufo ampinga</i>          | Reconstruction of FMNH PR 2512 | 83.4                      | 106.3                        | 17.1                      | 0.78                                    | 6.22                                   |
| <i>Amietophrynus mauretanicus</i>  | BMNH1920.1.20.676              | 17                        | 22.4                         | 6                         | 0.76                                    | 3.73                                   |
| <i>Amietophrynus mauretanicus</i>  | BMNH 62.1.9.13                 | 29                        | 35                           | 9                         | 0.83                                    | 3.89                                   |
| <i>Amietophrynus superciliaris</i> | BMNH 1906.5.28.14.9            | 30.1                      | 49                           | 8.7                       | 0.61                                    | 5.63                                   |
| <i>Boophis madagascariensis</i>    | BMNH 95.10.29.89               | 20.7                      | 21.8                         | 5                         | 0.95                                    | 4.36                                   |
| <i>Calyptocephalella gayi</i>      | BMNH 110                       | 39.5                      | 54.6                         | 11.4                      | 0.72                                    | 4.79                                   |
| <i>Calyptocephalella gayi</i>      | BMNH 1920.1.20.3930F           | 47.7                      | 69.5                         | 13.3                      | 0.69                                    | 5.23                                   |
| <i>Ceratobatrachus guentheri</i>   | BMNH 95.12.28.14               | 26.5                      | 30.8                         | 5.2                       | 0.86                                    | 5.92                                   |
| <i>Ceratophrys aurita</i>          | BMNH 1933.11.21.1              | 67.8                      | 107.5                        |                           | 0.63                                    |                                        |
| <i>Ceratophrys aurita</i>          | LACM 163430                    | 60.2                      | 97.0                         | 18.6                      | 0.62                                    | 5.23                                   |
| <i>Ceratophrys ornata</i>          | BMNH 83.4.14.15                |                           | 44                           | 6.6                       |                                         | 6.67                                   |
| <i>Ceratophrys ornata</i>          | UCZM R1530                     | 36.5                      | 49.6                         | 8.6                       | 0.74                                    | 5.77                                   |
| <i>Ceratophrys sp.</i>             | UCL W186                       | 45.3                      | 70.1                         | 11                        | 0.65                                    | 6.37                                   |
| <i>Glyphoglossus molossus</i>      | BMNH 1965.1060.61              | 13.4                      | 12                           | 5.8                       | 1.12                                    | 2.07                                   |
| <i>Heleioporus allopunctatus</i>   | BMNH 1907.3.13.4               | 22.6                      | 29.4                         | 7.4                       | 0.77                                    | 3.97                                   |
| <i>Hildebrandtia ornata</i>        | BMNH 1968.950                  | 19.6                      | 20.6                         | 5                         | 0.95                                    | 4.12                                   |
| <i>Hoplobatrachus tigerinus</i>    | BMNH Uncat.                    | 42                        | 45.6                         | 10.5                      | 0.92                                    | 4.34                                   |
| <i>Kaloula pulchra pulchra</i>     | BMNH 62.1.9.10                 | 13.5                      | 19.7                         | 5.8                       | 0.69                                    | 3.40                                   |
| <i>Kaloula pulchra pulchra</i>     | BMNH 1983                      | 14.9                      | 20.3                         | 5.8                       | 0.73                                    | 3.50                                   |
| <i>Lepidobatrachus asper</i>       | UCZM R1556                     | 22.7                      | 38                           | 5.6                       | 0.60                                    | 6.79                                   |
| <i>Limnodynastes dorsalis</i>      | BMNH 96.1.30.8                 | 17                        | 22.4                         | 5.1                       | 0.76                                    | 4.39                                   |
| <i>Limnodynastes tasmaniensis</i>  | BMNH 1901.9.13.9               | 12                        | 12                           | 3.5                       | 1.00                                    | 3.43                                   |
| <i>Litoria australis</i>           | BMNH 64.7.22.25                | 29.5                      | 41                           | 6.5                       | 0.72                                    | 6.31                                   |
| <i>Litoria platycephala</i>        | BMNH 1908.5.28.65              | 16.3                      | 26                           | 5.3                       | 0.63                                    | 4.91                                   |
| <i>Neobatrachus pictus</i>         | BMNH 1937.7.29.10              | 15.3                      | 18.1                         | 4.6                       | 0.85                                    | 3.93                                   |
| <i>Osteopilus crucialis</i>        | BMNH 12.12.11                  | 30.5                      | 40                           | 8.3                       | 0.76                                    | 4.82                                   |
| <i>Pelobates cultripes</i>         | BMNH 1920.1.20.682             | 24.2                      | 29.6                         | 7.55                      | 0.82                                    | 3.92                                   |
| <i>Pelobates fuscus</i>            | BMNH 1920.1.20.680             | 16.7                      | 23                           | 6.8                       | 0.73                                    | 3.38                                   |
| <i>Pelobates fuscus</i>            | BMNH 1915.9.15.6               | 16.3                      | 21.2                         | 5.8                       | 0.77                                    | 3.66                                   |
| <i>Phrynoidis asper</i>            | BMNH 62.3.20.4                 | 30.4                      | 43.4                         | 8.4                       | 0.70                                    | 5.17                                   |
| <i>Platyplectrum spenceri</i>      | BMNH 97.10.27.69               | 10.7                      | 9.8                          | 3.6                       | 1.09                                    | 2.72                                   |
| <i>Pyxicephalus adspersus</i>      | BMNH 63.2.21.7                 | 46                        | 64.4                         | 12.8                      | 0.71                                    | 5.03                                   |
| <i>Pyxicephalus adspersus</i>      | BMNH 12259                     | 24.3                      | 26.6                         | 5.3                       | 0.91                                    | 5.02                                   |
| <i>Rhinella marina</i>             | BMNH 63.2                      | 32                        | 48.6                         | 8.6                       | 0.66                                    | 5.65                                   |

|                                                 |                  |      |      |     |      |      |
|-------------------------------------------------|------------------|------|------|-----|------|------|
| <i>Rhinophrynus dorsalis</i>                    | BMNH 1983.925    | 13   | 13.8 | 4.3 | 0.94 | 3.21 |
| <i>Rhombophryne testudo</i>                     | BMNH 86.2.25.33  | 10.1 | 14.6 | 4.4 | 0.69 | 3.32 |
| <i>Scaphiophryne</i><br><i>madagascariensis</i> | BMNH 95.10.29.89 | 11   | 15.2 | 4   | 0.72 | 3.80 |
| <i>Scaphiopus holbrooki</i>                     | BMNH 233         | 21.4 | 27.7 | 7.2 | 0.77 | 3.85 |
| <i>Uperodon systoma</i>                         | BMNH 46.11.22.59 | 14.1 | 18   | 5.9 | 0.78 | 3.05 |

Empty cells indicate relevant dimension could not be measured due to missing or damaged skeletal components in specimen.

**Table S6. Molecular divergence dates for Hyloidea**

| Author(s)              | Date | MTDNA or nuclearDNA | Neobatrachia (Ma)   | Phthanobatrachia (Ma) | Notogaeonura (Ma) | Nobleobatrachia (Ma)     | Inclusive Ceratophryidae sensu Frost et al. 2006 (Ma) | Ceratophryidae sensu Pyron and Wiens 2011 (Ma) | <i>Ceratophrys-Lepidobatrachus</i> split (Ma) | Notes                                                                        |
|------------------------|------|---------------------|---------------------|-----------------------|-------------------|--------------------------|-------------------------------------------------------|------------------------------------------------|-----------------------------------------------|------------------------------------------------------------------------------|
| Vences et al.          | 2003 | Both                |                     | ~170                  |                   | ~130 <sup>1</sup>        |                                                       |                                                |                                               |                                                                              |
| Zhang et al.           | 2005 | MTDNA               |                     | 173 (152–195)         |                   | 97 (81–115) <sup>2</sup> |                                                       |                                                |                                               |                                                                              |
| San Mauro et al.       | 2005 | nuclearDNA          | 161.7 (128–199)     | 149.7 (117–186)       | 138 (108–171.6)   | 65 (51.9–82.8)           |                                                       |                                                |                                               |                                                                              |
| van der Meijden et al. | 2005 | Both                |                     | 133.6 (99.2–176.7)    |                   |                          |                                                       |                                                |                                               |                                                                              |
| Roelants et al.        | 2007 | Both                | 166.7 (149.3–185.7) | 161.3 (143.3–179.9)   | 145.6 (129–163.9) | 63 (52.6–77.1)           |                                                       | 53.2 (43.6–66.1)                               | 18.8 (12.7–26.1)                              | Bayesian Relaxed Clock Model (Thorne and Kishino 2002)                       |
| Roelants et al.        | 2007 | Both                | 150.3 (141.3–171.9) | 142 (130.1–161.9)     | 130 (119.3–151.2) | 58 (49.4–70.8)           |                                                       | 48.7 (41.1–59.2)                               | 18.4 (9.8–27.2)                               | Penalized Likelihood Model                                                   |
| Roelants et al.        | 2007 | Both                | 160.9 (143.9–179.3) | 155.5 (139.1–173.8)   | 142 (124.3–160.5) | 63.2 (52.7–75.9)         | 48.8 (40.8–60.5)                                      |                                                | 15.2 (10–21.3)                                | Constrained to match Frost et al. (2006)                                     |
| Wiens                  | 2007 | nuclearDNA          | 107.635             |                       |                   | 92.31                    |                                                       |                                                |                                               | Based on Anura-Caudata split at 250 Ma                                       |
| Wiens                  | 2007 | nuclearDNA          | 124.65              |                       |                   | 106.43                   |                                                       |                                                |                                               | Based on Anura-Caudata split at 300 Ma                                       |
| Wiens                  | 2007 | nuclearDNA          | 154.85              |                       |                   | 132.84                   |                                                       |                                                |                                               | Based on Anura-Caudata split at 350 Ma                                       |
| van der Meijden et al. | 2007 | nuclearDNA          |                     | 151 (116–197)         |                   |                          |                                                       |                                                |                                               |                                                                              |
| Igawa et al.           | 2008 | MTDNA               |                     | 170 (140–202)         |                   | 97 (65–133) <sup>2</sup> |                                                       |                                                |                                               |                                                                              |
| Heinicke et al.        | 2009 | Both                |                     |                       |                   | 73.9 (53–99.7)           |                                                       |                                                |                                               |                                                                              |
| Wiens                  | 2011 | nuclearDNA          | ~155                | ~150                  | ~135              | ~75                      |                                                       | 65.5 <sup>3</sup>                              | ~20                                           | Taken from Fig. 1: Penalized Likelihood                                      |
| Wiens                  | 2011 | nuclearDNA          | ~210                | ~200                  | ~175              |                          |                                                       | ~95                                            | ~40                                           | Taken from Fig. 2: Bayesian analysis using BEAST (Drummond and Rambaut 2007) |
| Roelants et al.        | 2011 | Both                | 170.5 (156.8–184.9) | 162.5 (149.3–175.8)   | 155.4 (141–169.6) | 68.2 (59.6–78)           |                                                       | ~65.4 (56.6–75) <sup>4</sup>                   | 24.1 (18.1–31.1)                              | Bayesian analysis using MDT (Thorne and Kishino 2002)                        |

|                 |      |       |                     |                     |                     |                   |                                     |                                |                 |                                                           |
|-----------------|------|-------|---------------------|---------------------|---------------------|-------------------|-------------------------------------|--------------------------------|-----------------|-----------------------------------------------------------|
| Roelants et al. | 2011 | Both  | 166.4 (146.3–187.4) | 157.5 (138.5–177.8) | 145.6 (126.1–166.5) | 90.0 (76.3–106.6) |                                     | 88.2 (73.7–103.7) <sup>4</sup> | 19.3 (8.7–32.2) | Bayesian analysis using BEAST (Drummond and Rambaut 2007) |
| Ruane et al.    | 2011 | Both  |                     |                     |                     | 80.1 (74.5–85.2)  |                                     |                                | 64 (61.7–66.3)  | With <i>Beelzebufo</i> as crown-ceratophryid              |
| Ruane et al.    | 2011 | Both  |                     |                     |                     | 71.4 (67.2–75.5)  |                                     |                                | 13.6 (8.9–19.2) | With <i>Beelzebufo</i> as stem-ceratophryid               |
| Ruane et al.    | 2011 | Both  |                     |                     |                     | 58.1 (52.2–64.5)  |                                     |                                | 12 (7.6–16.7)   | Without <i>Beelzebufo</i>                                 |
| Irisarri et al. | 2012 | Both  | ~160 (187–135)      | ~150 (175–125)      | ~130                | ~80 (110–41)      | ~55 <i>Telmatobius</i> <sup>5</sup> |                                |                 | Taken from Fig. 2                                         |
| Zhang et al.    | 2013 | MTDNA | 132 (114–153)       | 126.8 (109–147)     | 115.6 (99–135)      | 96.1 (82–113)     |                                     | 64.2 (53–77)                   |                 | Bayesian analysis using MDT (Thorne and Kishino 2002)     |
| Zhang et al.    | 2013 | MTDNA | 194.2 (162–229)     | 184.6 (154–219)     | 155.1 (124–194)     | 124.9 (99–157)    |                                     | 62.1 (43–81)                   |                 | Bayesian analysis using BEAST (Drummond and Rambaut 2007) |

<sup>1</sup>This is a minimum age as the authors used *Bufo* and *Leptodactylus* and this represents a more deeply nested node, Chthonobatrachia (Frost et al., 2006).

<sup>2</sup>This is a minimum age as the authors used only *Bufo* and *Hyla* and thus this represents a more deeply nested node, Athesphatanura (Frost et al. , 2006).

<sup>3</sup>Node calibrated on *Beelzebufo*

<sup>4</sup>Date estimate taken from node 66 roughly level with base of ceratophryid stem

<sup>5</sup>The authors used *Telmatobius* alone to represent Ceratophryidae sensu Frost et al. (2006).

## References

Drummond AJ, Rambaut A (2007) BEAST: Bayesian evolutionary analysis by sampling trees. BMC Evol Biol 7: 214.

Frost DR, Grant T, Faivovich J, Bain RH, Haas A, et al. (2006) The amphibian tree of life. Bull Am Mus Nat Hist 297: 1–370.

Heinicke MP, Duellman WE, Trueb L, Means DB, MacCulloch RD, et al. (2009) New frog family (Anura: Terrana) from South America and an expanded direct-developed clade revealed by molecular phylogeny. Zootaxa 2211: 1–35.

Igawa T, Kurabayashi A, Usuki C, Fujii T, Sumida M (2008) Complete mitochondrial genomes of three neobatrachian anurans: a case study of divergence time estimation using different data and calibration settings. Gene 407: 116–129.

Irisarri I, San Mauro D, Abascal F, Ohler A, Vences M, et al. (2012) The origin of modern frogs (Neobatrachia) was accompanied by acceleration in mitochondrial and nuclear substitution rates. BMC Genomics 13: 626.

- Pyron RA, Wiens JJ (2011). A large-scale phylogeny of Amphibia including over 2800 species, and a revised classification of extant frogs, salamanders, and caecilians. *Mol Phylogenet Evol* 61: 543–583.
- Roelants K, Gower DJ, Wilkinson M, Loader SP, Biju SD, et al. (2007) Global patterns of diversification in the history of modern amphibians. *Proc Natl Acad Sci USA* 104: 887–892.
- Roelants K, Haas A, Bossuyt F (2011) Anuran radiations and the evolution of tadpole morphospace. *Proc Natl Acad Sci USA* 108: 8731–8736.
- Ruane S, Pyron RA, Burbrink FT (2011) Phylogenetic relationships of the Cretaceous frog *Beelzebufo* from Madagascar and the placement of fossil constraints based on temporal and phylogenetic evidence. *J Evol Biol* 24: 274–285.
- San Mauro D, Vences M, Alcobendas M, Zardoya R, Meyer A (2005) Initial diversification of living amphibians predated the breakup of Pangaea. *Am Nat* 165: 590–599.
- Thorne JL, Kishino H (2002) Divergence time and evolutionary rate estimation with multilocus data. *Syst Biol* 51: 689–702.
- van der Meijden A, Vences M, Hoegg S, Meyer A (2005) A previously unrecognised radiation of ranid frogs in Southern Africa revealed by nuclear and mitochondrial DNA sequences. *Mol Phylogenet Evol* 37: 674–685.
- van der Meijden A, Vences M, Hoegg S, Boistel R, Channing A, et al. (2007) Nuclear gene phylogeny of narrow-mouthed toads (Family: Microhylidae) and a discussion of competing hypotheses concerning their biogeographical origins. *Mol Phylogenet Evol* 44: 1017–1030.
- Vences M, Vieites DR, Glaw F, Brinkmann H, Kosuch J, et al. (2003) Multiple overseas dispersal in amphibians. *Proc Roy Soc Lond B Bio* 270: 2435–2442.
- Wiens JJ (2007) Global patterns of diversification and species richness in amphibians. *Am Nat* 170: S86–S106.
- Wiens JJ (2011) Re-evolution of lost mandibular teeth in frogs after more than 200 million years, and re-evaluating Dollo's Law. *Evolution* 65: 1283–1296.
- Zhang P, Zhou H, Chen YQ, Liu YF, Qu LH (2005) Mitogenomic perspectives on the origin and phylogeny of living amphibians. *Syst Biol* 54: 391–400.
- Zhang P, Liang D, Mao R-L, Hillis DM, Wake DB, et al. (2013) Efficient sequencing of anuran mtDNAs and a mitogenomic exploration of the phylogeny and evolution of frogs. *Mol Biol Evol* online. doi: 10.1093/molbev/mst091.
